# Supplementary material for: Incidence and risk factors of gestational diabetes mellitus in Goba town, Southeast Ethiopia: a prospective cohort study
Source: PubMed Central journal article supplement — BMJ Open. 2022 Sep 26;12(9):e060694. doi: 10.1136/bmjopen-2021-060694 (PMC9516079; doi:10.1136/bmjopen-2021-060694), 2022-09-26
Supplement: bmjopen-2021-060694.draft_revisions.pdf [file bmjopen-2021-060694.draft_revisions.pdf]

# BMJ Open

BMJ Open is committed to open peer review. As part of this commitment we make the peer review history of every article we publish publicly available.

When an article is published we post the peer reviewers' comments and the authors' responses online. We also post the versions of the paper that were used during peer review. These are the versions that the peer review comments apply to.

The versions of the paper that follow are the versions that were submitted during the peer review process. They are not the versions of record or the final published versions. They should not be cited or distributed as the published version of this manuscript.

BMJ Open is an open access journal and the full, final, typeset and author-corrected version of record of the manuscript is available on our site with no access controls, subscription charges or pay-per-view fees (<http://bmjopen.bmj.com>).

If you have any questions on BMJ Open's open peer review process please email [info.bmjopen@bmj.com](mailto:info.bmjopen@bmj.com)

# BMJ Open

## Incidence and risk factors of gestational diabetes mellitus among pregnant women in Southeast Ethiopia: a prospective study

|                               |                                                                                                                                                                                                                                                                                                                                                                                                                                                                                                                                                                                                                                                                                                                                                                                                                                                                                                                                                                                                                                                                                                                                                                                                                                                                                                                                                                                                                                                                                                              |
|-------------------------------|--------------------------------------------------------------------------------------------------------------------------------------------------------------------------------------------------------------------------------------------------------------------------------------------------------------------------------------------------------------------------------------------------------------------------------------------------------------------------------------------------------------------------------------------------------------------------------------------------------------------------------------------------------------------------------------------------------------------------------------------------------------------------------------------------------------------------------------------------------------------------------------------------------------------------------------------------------------------------------------------------------------------------------------------------------------------------------------------------------------------------------------------------------------------------------------------------------------------------------------------------------------------------------------------------------------------------------------------------------------------------------------------------------------------------------------------------------------------------------------------------------------|
| Journal:                      | <i>BMJ Open</i>                                                                                                                                                                                                                                                                                                                                                                                                                                                                                                                                                                                                                                                                                                                                                                                                                                                                                                                                                                                                                                                                                                                                                                                                                                                                                                                                                                                                                                                                                              |
| Manuscript ID                 | bmjopen-2021-060694                                                                                                                                                                                                                                                                                                                                                                                                                                                                                                                                                                                                                                                                                                                                                                                                                                                                                                                                                                                                                                                                                                                                                                                                                                                                                                                                                                                                                                                                                          |
| Article Type:                 | Original research                                                                                                                                                                                                                                                                                                                                                                                                                                                                                                                                                                                                                                                                                                                                                                                                                                                                                                                                                                                                                                                                                                                                                                                                                                                                                                                                                                                                                                                                                            |
| Date Submitted by the Author: | 30-Dec-2021                                                                                                                                                                                                                                                                                                                                                                                                                                                                                                                                                                                                                                                                                                                                                                                                                                                                                                                                                                                                                                                                                                                                                                                                                                                                                                                                                                                                                                                                                                  |
| Complete List of Authors:     | <p>Atlaw, Daniel; Madda Walabu University, ;<br/>           Sahiledengle, Biniyam; Madda Walabu University, Public Health<br/>           Assefa, Tesfaye ; Madda Walabu University<br/>           Negash, Wogene ; Madda Walabu University<br/>           Tahir, Anwar ; Madda Walabu University<br/>           Regasa, Tadele ; Madda Walabu University<br/>           Tekalegn, Yohannes; Madda Walabu University, Department of Public Health<br/>           Mamo, Ayele ; Madda Walabu University<br/>           Enegeda , zinash; Madda Walabu University<br/>           Solomon, Damtew ; Madda Walabu University<br/>           Gezahegn, Habtamu ; Madda Walabu University<br/>           Kebebe Bekele, Kebebe ; Madda Walabu University<br/>           Zenbaba, Demisu; Madda Walabu University, Public Health; Madda Walabu University, Public health<br/>           Tasew, Alealign ; Madda Walabu University<br/>           Desta, Fikreab; Madda Walabu University<br/>           Nugusu, Fikadu ; Madda Walabu University<br/>           Beressa, Girma; Madda Walabu University, Public Health; Jimma University, Public Health<br/>           Shiferaw, Zerihun ; Madda Walabu University<br/>           Feleke, Zegeye ; Madda Walabu University<br/>           Feleke, Zegeye ; Madda Walabu University<br/>           Duguma, Negesso; Madda Walabu University<br/>           Chattu, Vijay Kumar; Saveetha University Saveetha Medical College and Hospital, Department of Medicine</p> |
| Keywords:                     | Diabetes in pregnancy < DIABETES & ENDOCRINOLOGY, Antenatal < GENETICS, Anaemia < HAEMATOLOGY, Diabetes & endocrinology < INTERNAL MEDICINE                                                                                                                                                                                                                                                                                                                                                                                                                                                                                                                                                                                                                                                                                                                                                                                                                                                                                                                                                                                                                                                                                                                                                                                                                                                                                                                                                                  |
|                               |                                                                                                                                                                                                                                                                                                                                                                                                                                                                                                                                                                                                                                                                                                                                                                                                                                                                                                                                                                                                                                                                                                                                                                                                                                                                                                                                                                                                                                                                                                              |

SCHOLARONE™  
Manuscripts

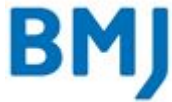

I, the Submitting Author has the right to grant and does grant on behalf of all authors of the Work (as defined in the below author licence), an exclusive licence and/or a non-exclusive licence for contributions from authors who are: i) UK Crown employees; ii) where BMJ has agreed a CC-BY licence shall apply, and/or iii) in accordance with the terms applicable for US Federal Government officers or employees acting as part of their official duties; on a worldwide, perpetual, irrevocable, royalty-free basis to BMJ Publishing Group Ltd ("BMJ") its licensees and where the relevant Journal is co-owned by BMJ to the co-owners of the Journal, to publish the Work in this journal and any other BMJ products and to exploit all rights, as set out in our [licence](#).

The Submitting Author accepts and understands that any supply made under these terms is made by BMJ to the Submitting Author unless you are acting as an employee on behalf of your employer or a postgraduate student of an affiliated institution which is paying any applicable article publishing charge ("APC") for Open Access articles. Where the Submitting Author wishes to make the Work available on an Open Access basis (and intends to pay the relevant APC), the terms of reuse of such Open Access shall be governed by a Creative Commons licence – details of these licences and which [Creative Commons](#) licence will apply to this Work are set out in our licence referred to above.

Other than as permitted in any relevant BMJ Author's Self Archiving Policies, I confirm this Work has not been accepted for publication elsewhere, is not being considered for publication elsewhere and does not duplicate material already published. I confirm all authors consent to publication of this Work and authorise the granting of this licence.

# Incidence and risk factors of gestational diabetes mellitus among pregnant women in Southeast Ethiopia: a prospective study

Daniel Atlaw<sup>1</sup>, Biniyam Sahiledengle<sup>2</sup>, Tesfaye Assefa<sup>3</sup>, Wogene Negash<sup>3</sup>, Anwar Tahir<sup>3</sup>, Tadele Regasa<sup>1</sup>, Yohannes Tekalign<sup>2</sup>, Ayele Mamo<sup>4</sup>, Zinash Teferu<sup>2</sup>, Damtew Solomon<sup>1</sup>, Habtamu Gezahegn<sup>1</sup>, Kebebe Bekele<sup>5</sup>, Demisu Zenbaba<sup>2</sup>, Alelign Tasew<sup>2</sup>, Fikreab Desta<sup>2</sup>, Fikadu Nugusu<sup>2</sup>, Girma Beressa<sup>2</sup>, Zerihun Shiferaw<sup>1</sup>, Zegeye Feleke<sup>3</sup>, Zegeye Regassa<sup>3</sup>, Negesso Duguma<sup>6</sup>, Vijay Kumar Chattu<sup>7</sup>

1Biomedical Department, Madda Walabu University, Goba Referral Hospital, Bale Goba, Ethiopia

2Public Health Department, Madda Walabu University, Goba Referral Hospital, Bale Goba, Ethiopia

3Nursing Department, Madda Walabu University, Goba Referral Hospital, Bale Goba, Ethiopia

4Pharmacy Department, Madda Walabu University, Goba Referral Hospital, Bale Goba, Ethiopia

5Surgery Department, Madda Walabu University, Goba Referral Hospital, Bale Goba, Ethiopia

6Department of laboratory, Madda Walabu University, Goba Referral Hospital, Bale Goba, Ethiopia

7Department of Public Health, Saveetha Medical College and Hospitals, SIMATS, Saveetha University, Chennai 600077– India

Corresponding author

DA: [danielatmwu@gmail.com](mailto:danielatmwu@gmail.com)

## Abstract

**Objective:** Gestational diabetes mellitus (GDM) increases the risk of perinatal morbidity. Currently, GDM is becoming a public health concern in low and middle-income countries (LMICs), and it is known to cause severe morbidity for mothers and newborns. Hence, this study aimed to assess the incidence and predictors of gestational diabetes mellitus among antenatal care (ANC) pregnant women in Goba town.

**Design:** A prospective cohort study.

**Setting:** Goba town health centers in southeast Ethiopia.

**Participants:** 480 pregnant women on ANC follow up from April 30<sup>th</sup> to 30<sup>th</sup> september 2021.

**Primary and secondary outcome:** Incidence and risk factors of gestational diabetes mellitus.

**Results:** The cumulative incidence of GDM in this study was 15.7% [95% CI: (12.3, 19.2)]. Being unemployed [aRR = 2.73, 95% CI: (1.36, 5.47)], having a family history of diabetes [aRR = 3.01; 95% CI: (2.09,4.35)], low physical activity [aRR = 2.43, 95%CI: (1.11, 5.32)], inadequate dietary diversity [aRR = 1.48,95%CI: (1.29,1.92)], anemia [aRR=2.51; 95% CI: (1.32, 3.54)] and antenatal depression [aRR =4.95; 95% CI: (3.35, 7.31)] were significantly associated with GDM.

**Conclusion:** The cumulative incidence of GDM was relatively high. Having antenatal depression symptoms, low physical activity, inadequate dietary diversity, being unemployed, anemia, and family history of DM were identified as significant risk factors for the occurrence of GDM.

**Keywords:** Gestational diabetes mellitus, pregnant women, risk factors, Ethiopia

### Strength and limitations of the study

- First prospective study in the study setting gestational diabetes mellitus
- First, in this study fasting plasma glucose is used to diagnose GDM due to lack of resources for oral glucose tolerance test that might affect the strength of recommendations.

- 1  
2  
3  
4  
5  
6  
7  
8
- Second, pre-pregnancy anthropometric measurement and BMI were not determined among pregnant women which may be part of the determinant factors.

## 9 **Background**

10 Gestational diabetes mellitus (GDM) is a glucose intolerance detected during pregnancy for the  
11 first time (1). Pregnancy itself induces changes in maternal glucose metabolism and insulin  
12 sensitivity, thereby increasing the demand for insulin production (2). Gestational diabetes  
13 mellitus diagnosed in pregnancy complicates 3% to 5% of pregnancies, and it is associated with  
14 an increased risk for perinatal morbidity (3).  
15  
16

17  
18 Diabetes mellitus and other non-communicable diseases are becoming more prevalent in  
19 developing countries, including Ethiopia (4). Globally, diabetes prevalence is increasing rapidly,  
20 estimated 381 million in 2013 to 422 million living with diabetes in 2015. According to the  
21 international diabetes federation's (IDF) projection, by 2035, the global burden of diabetes will  
22 reach 592 million people, or one in 10, will have diabetes (5). The International Diabetes  
23 Federation estimates that 16.2% of live births to women had some form of hyperglycemia in  
24 pregnancy (6). In sub-Saharan Africa (SSA), the burden was revealed to be 14.28% (7). In  
25 Ethiopia, women are at greater risk of GDM despite having a lower mean body mass index  
26 (BMI) (8). In a study conducted in Gondar town, the cumulative incidence was 12.8% (9). Other  
27 studies conducted in Wolita and Hadiya zones, the southern part of Ethiopia reported the  
28 cumulative incidence of GDM to be 4.2% (10) and 26.2% (11), respectively.  
29  
30  
31  
32  
33  
34  
35  
36  
37

38 Gestational diabetes mellitus is associated with a greater risk of neonatal macrosomia (12,13),  
39 shoulder dystocia, neonatal trauma, respiratory distress, increased admission to neonatal  
40 intensive care units (14). Women with hyperglycemia detected during pregnancy are at greater  
41 risk of adverse pregnancy outcomes, with an incidence of 30.3% (15). These include high blood  
42 pressure and birth difficulties, with the baby more prone to fractures and nerve damage (6).  
43 Gestational diabetes mellitus also results in permanent type 2 diabetes in women, with an  
44 incidence ranging from 2.6% to 70% (16,17).  
45  
46  
47  
48  
49  
50

51 High GDM prevalence was observed in mothers with a family history of type 2 diabetes  
52 (13,18,19), previous stillbirth, high mid-upper arm circumference (MUAC), and anemia (20,21).  
53 Advanced maternal age (22), inactive physical activity, and risky behaviors have also been  
54  
55  
56  
57  
58  
59  
60

1  
2  
3 shown to increase the magnitude of GDM (19,23). The proportion of gestational diabetes  
4 mellitus increases with the number of pregnancies (24).  
5  
6

7 Adverse outcomes in pregnancies among women with diabetes are, in most cases, preventable by  
8 optimizing glycemic control. Early screening and treatment of mothers with GDM can minimize  
9 the complications for both mothers and their babies (14). Once diagnosed with GDM, a woman  
10 has a substantial chance of developing type 2 diabetes following delivery, with some studies  
11 reporting a 5-year cumulative incidence rate of over 50% (25).  
12  
13  
14  
15

16 Despite all the above facts, there are few studies on the incidence and associated factors of GDM  
17 in SSA (26), including Ethiopia, particularly in the study setting. Therefore, we aimed to assess  
18 the incidence and predictors of GDM in Southeast Ethiopia.  
19  
20  
21

## 22 **Methods**

### 23 **Study design and setting**

24  
25 A facility-based prospective follow-up study was conducted among pregnant women in health  
26 centers, Goba town from April 30<sup>th</sup> to September 30<sup>th</sup>, 2021. The pregnant women were followed  
27 from 20 weeks of gestation to 32 weeks. Goba is one of the administrative towns in the Bale  
28 zone, located 445km away from Addis Ababa city. According to the 2019 fiscal year, the total  
29 population of Goba town was 51,562 and the estimated number of pregnant women was 1789  
30 (27). The town has two health centers and one referral hospital. The health centers found in Goba  
31 town serve more than three-fourths of pregnant women for antenatal care (ANC) follow-up.  
32  
33  
34  
35  
36  
37  
38

### 39 **Source population**

40  
41 All pregnant women who started ANC were followed-up at Harawa Sinja and Oda Baha Health  
42 Center, Goba town, southeast Ethiopia.  
43  
44

### 45 **Study population**

46  
47 Pregnant women with a gestational age of 20 weeks who were on ANC at Harawa Sinja and Oda  
48 Baha Health Center, Goba town, Southeast Ethiopia.  
49  
50  
51

### 52 **Inclusion criteria**

Pregnant women who are permanent residents of the study area and without any known pre-existing or overt diabetes mellitus (DM).

### Exclusion criteria

Pregnant women who took medications that could affect glucose metabolisms, such as steroids, beta-adrenergic agonists, and anti-psychotic medications, and who have an acute febrile illness were excluded.

### Sample size determination and sampling techniques

Sample size estimation was determined using Epi Info version 7 software, taking into account the following statistical assumptions: The proportion of stillbirths in the non-exposed and exposed groups was 5.17% and 14%, respectively, at a confidence level of 95% (2-sided), power of 80%, and exposed to non-exposed ratio of 1:2 (9). Considering the loss to follow-up of 15%, the minimum sample size required for the study was 480 pregnant women.

Table 1: Sample size calculation for different associated factors

| Exposure variables       | Exposed to non-exposed ratio | Event in the non-exposed vs exposed | Power of the study | Crude odds ratio | Total sample size |
|--------------------------|------------------------------|-------------------------------------|--------------------|------------------|-------------------|
| Family history of DM (9) | 1:2                          | 5.17% vs 14%                        | 80                 | 2.97             | 417               |
| History of abortion (10) | 1:2                          | 16.3% vs 45.5%                      | 80                 | 4.2              | 101               |
| previous GDM(21)         | 1:2                          | 1.8% vs 12%                         | 80                 | 7.4              | 236               |

All pregnant women on ANC follow-up at two health centers, Goba town and fulfilled our inclusion criteria were included in the study.

### Variables of the study

#### Dependent variable

**Gestational diabetes mellitus** :- Defined as blood glucose level that fulfills one of the following criteria according to updated world health organization (WHO) diagnostic criteria (Fasting



1  
2  
3 plasma glucose between 92 to 125 mg/dl or one-hour oral glucose tolerance test  $\geq$  180mg/dl or  
4 two-hour oral glucose tolerance test between 153 to 199 mg/dl) (1)  
5  
6

### 7 **Exposure variables**

8  
9 Sociodemographic variables such as pregnant women's age, occupation, religion, ethnicity, and  
10 educational status; behavioral variables (caffeine, alcohol, dietary diversity and smoking);  
11 reproductive related factors; previous history of (GDM, pregnancy-induced hypertension,  
12 stillbirth, intrauterine fetal death, and spontaneous abortion); health-related (chronic disease); and  
13 family history of type 2 DM and GDM) were considered in this study.  
14  
15  
16  
17  
18

### 19 **Data collection procedures**

20 An interviewer-administered, a structured questionnaire was prepared in English and translated  
21 into the local language 'Amharic and Afan Oromo.' The questionnaire was back-translated into  
22 English to assure consistency. The questionnaire was checked by language experts (MA holders  
23 in language). Midwifery with a Bachelor of Science degree was involved in the data collection  
24 activity. Three days of training were provided to data collectors aiming to familiarize them with  
25 the study's objectives, data collection methods, ethical issues, and the contents of the  
26 questionnaire.  
27  
28  
29  
30  
31  
32

33 Both primary and secondary data (chart review) were collected. The baseline maternal and socio-  
34 demographic characteristics, behavioral, dietary diversity, and antenatal depression status were  
35 collected using face-to-face interviews. Dietary diversity was assessed using a 24- hour food  
36 recall method by the Food and Nutrition Technical Assistance (FANTA) 2016 version of the  
37 woman's minimum dietary diversity measurement tool. The four or less minimum dietary  
38 diversity score (MDDS) was categorized as inadequate dietary diversity (28).  
39  
40  
41  
42  
43

44 The Edinburgh Postnatal Depression Scale (EPDS) screening tool was utilized to assess antenatal  
45 depression in the past week (29). The short form of the International Physical Activity  
46 Questionnaire (IPAQ) was employed to assess the physical activities of the last seven days.  
47 Then, using metabolic equivalents (MET-minutes per week) of the IPAQ scoring protocol,  
48 pregnant women were categorized into a high, moderate, and low level of physical activity (30).  
49  
50  
51  
52  
53

54 Fasting blood glucose was performed for all pregnant women by plasma glucose testing, using a  
55 standard plasma-calibrated glucometer (Hemo Cue Glucose B-201+ (Sweden)) following new  
56  
57

1  
2  
3 recommendations by WHO for GDM diagnosis (1) (31). Initially, a blood glucose test (random  
4 blood glucose) was performed for all selected pregnant women at 20 weeks of gestation to rule  
5 out the presence of preexisting diabetes or overt diabetes. Then screening for GDM using fasting  
6 blood glucose was performed at 24-28 weeks of gestational age (Figure 1). A similar  
7 measurement was repeated at 32 weeks of gestation to identify the late occurrence of GDM.  
8 Participants diagnosed with GDM were referred immediately (linked) to health care providers  
9 who are experts in managing GDM. Follow-ups were assured through the public health facilities  
10 in close collaboration with experts and data collectors.  
11  
12  
13  
14  
15  
16

### 17 **Data quality control**

18  
19 The data quality was assured by applying a properly designed and pre-tested questionnaire. The  
20 tool was pre-tested on five percent of the sample size at the Baha Biftu health center one week  
21 before the actual data collection to establish its ability to elicit relevant information. In addition,  
22 the researchers ensured proper categorization and coding of the questions. The investigators and  
23 a supervisor conducted regular supervision and follow-up. In addition, a regular check-up for  
24 completeness and consistency of the data was undertaken daily. Incomplete questionnaires were  
25 completed during the second appointment. All plasma glucose measurements strictly followed  
26 the manufacturer's instructions and standard operating procedures.  
27  
28  
29  
30  
31  
32

### 33 **Data processing and analysis**

34  
35 The questionnaires were coded manually. The data were entered into Epi-data version 3.1 and  
36 then exported from Epi-data to Stata 14 for analysis. Data were checked for missing values.  
37 Descriptive statistics were presented using frequencies, percentages, mean and standard  
38 deviations to describe study subjects. Multicollinearity was checked by looking at values of  
39 variance inflation factors ( $VIF < 7$ ). The final model fitness was assessed using the Hosmer-  
40 Lemeshow goodness of fit test. Bivariate log-binomial regression analysis was employed to  
41 examine the relationship between the outcome and independent variables. Those variables with  $p$   
42  $\leq 0.2$  in the bivariate log-binomial regression analyses were entered into a multivariable log-  
43 binomial regression model. This helps to identify important associated factors for the dependent  
44 variables after controlling possible confounding factors. The crude and adjusted relative risk was  
45 used to estimate the strength of the association between predictors and outcome variables.  
46 Variables with a  $p$ -value  $< 0.05$  were considered statistically significant with the outcome  
47 variable.  
48  
49  
50  
51  
52  
53  
54  
55  
56  
57

## Patient and public involvement

Patients and the public were not involved in the planning, designing and interpreting of these data analyses.

## Ethical considerations

The research protocol was approved by Ethical Review Committee, Madda Walabu University (Reference no: RDD/0097/13). All methods were conducted following the relevant tenets of the Helsinki Declaration. An official letter was obtained from the Goba town health office. Then, the letters were given to the Harawa Sinja Health Center and the Oda Baha Health Center heads. Finally, written consent was obtained from each study participant after explaining the risk and benefit of participating in the study. The privacy of the respondents was protected throughout the data collection process, and anonymity and confidentiality of the data were maintained.

## Results

### Sociodemographic and economic characteristics of pregnant women

The study included a total of 432 pregnant women, making the response rate 90%. The mean age of the pregnant women was 26.58 (SD  $\pm$  5.88) years. Most of the participants (97.8%) were married, (88.9%) were from the Oromo ethnic group, and nearly half (47.5%) were Muslim in religion. One hundred thirty-seven (31.7%) women had attended secondary school education, while about 80.5% of pregnant women were unemployed (Table 2).

Table 2: Sociodemographic and economic characteristics of pregnant women attending ANC follow up at health centers of Goba town, southeast Ethiopia: April to September 2021 (n=432)

| Variables    |                     | Non-GDM n (%) | GDM n(%)  | Total (%) |
|--------------|---------------------|---------------|-----------|-----------|
| Age in years | < 25                | 159 (43.7)    | 23 (33.8) | 182(42.1) |
|              | 25-29               | 120 (33.0)    | 21(30.9)  | 141(32.6) |
|              | 30-34               | 52 (14.3)     | 13 (19.1) | 65 (15.1) |
|              | >34                 | 33 (9.1)      | 11(16.2)  | 44(10.2)  |
| Religion     | Orthodox            | 157 (43.1)    | 28 (41.1) | 185(42.8) |
|              | Muslim              | 173 (47.5)    | 32 (47.1) | 205(47.5) |
|              | Protestant          | 34 (9.3)      | 8 (11.8)  | 42(9.7)   |
| Ethnicity    | Oromo               | 293 (80.5)    | 55 (80.9) | 348(88.9) |
|              | Amhara              | 61 (16.8)     | 11(16.2)  | 72 (16.7) |
|              | Others              | 10 (2.7)      | 2(2.9)    | 12 (2.8)  |
| Educational  | No formal education | 53 (14.6)     | 11(16.3)  | 64 (14.8) |

|                     |                   |            |           |            |
|---------------------|-------------------|------------|-----------|------------|
| status              | Primary school    | 117 (32.1) | 19 (27.9) | 136 (31.5) |
|                     | Secondary school  | 118 (32.4) | 19 (27.9) | 137 (31.7) |
|                     | Collage and above | 76 (20.9)  | 19 (27.9) | 95 (21.9)  |
| Occupational status | Employed          | 60 (16.5)  | 24 (35.3) | 84 (19.4)  |
|                     | Non employed      | 304 (83.5) | 44 (64.7) | 348 (80.6) |

\*Others (Gurage, Wolita)

### Clinical characteristics of study participants

The mean systolic blood pressure was 105.9 (SD  $\pm$  10.2) mmHg, and diastolic blood pressure was 66.4 (SD  $\pm$  7.6) mmHg. The pregnant women's mean hemoglobin and random blood glucose levels were 11.9 (SD  $\pm$ 1.1) and 108 (SD  $\pm$ 16.7), respectively. Nearly one-third (33.8%) of the women were primigravida. Twenty-seven (6.3%) had a family history of diabetes mellitus. Fifty (11.6%) pregnant women were identified to have anemia. The previous history of abortion and stillbirth were reported among 3 and 3.8% of pregnant women, respectively (Table 3).

Table 3: Obstetric history of study participant attending ANC follow up at health centers of Goba town, southeast Ethiopia: April to September 2021 (n=432)

| Variables                                           |                | Non-GDM (n=364) | GDM (n=68) | Total      |
|-----------------------------------------------------|----------------|-----------------|------------|------------|
| Gravidity                                           | One            | 143 (39.3)      | 23 (33.9)  | 146 (33.8) |
|                                                     | Two            | 99 (27.2)       | 22 (32.4)  | 121 (28.0) |
|                                                     | Three          | 68 (18.6)       | 11(16.2)   | 79 (18.3)  |
|                                                     | Four and above | 54 (14.3)       | 12(17.6)   | 66(15.3)   |
| History of abortion/<br>Intrauterine fetal death    | Yes            | 5 (2.3)         | 3 (6.7)    | 8 (3.0)    |
|                                                     | No             | 216 (97.7)      | 42 (93.3)  | 258 (97.0) |
| History of Stillbirth                               | Yes            | 8 (3.6)         | 2 (4.4)    | 10 (3.8)   |
|                                                     | No             | 213 (96.4)      | 43 (95.6)  | 256 (96.2) |
| History of confirmed PIH<br>in a previous pregnancy | Yes            | 12 (5.4)        | 2 (4.4)    | 14 (5.3)   |
|                                                     | No             | 209 (94.6)      | 43 (95.6)  | 252(94.8)  |
| History of confirmed GDM<br>in a previous pregnancy | Yes            | 2 (0.9)         | 1 (2.2)    | 3 (1.1)    |
|                                                     | No             | 119 (91.1)      | 44 (97.8)  | 263 (99.9) |
| Family history of Diabetes                          | Yes            | 17 (4.7)        | 10 (14.7)  | 27 (6.3)   |
|                                                     | No             | 347 (95.3)      | 58 (85.3)  | 405 (93.7) |
| Hemoglobin status                                   | < 11mg/dl      | 35 (9.6)        | 15 (22.1)  | 50 (11.6)  |
|                                                     | $\geq$ 11mg/dl | 329 (90.4)      | 53 (77.9)  | 372 (88.4) |

A slightly higher proportion of diabetes family history was revealed among women with GDM than non-GDM (14.7% vs. 4.7%). When pregnant women were compared in terms of anemia

status, those with GDM were identified to have a higher proportion than non-GDM (22.1% vs. 9.6%) (Table 3).

### Behavioral and lifestyle characteristics of pregnant mothers

Out of total participants, alcohol and coffee intake during pregnancy was reported by (17.8%) and (90%), respectively. Out of women who consumed coffee, nearly one-third of them reported consuming two cups of coffee per day. Most pregnant women (45.8%) reported having low physical activity, while about one in ten pregnant women reported having probable antenatal depression symptoms. An inadequate dietary diversity score was reported in 6.3% of pregnant women who participated in this study (Table 4).

Table 4: Behavioral characteristics of study participant attending ANC follow up at health centers of Goba town, southeast Ethiopia 2021(n=432)

| Variable                                     |                     | Non-GDM<br>(n=364) | GDM<br>(n=68) | Total      |
|----------------------------------------------|---------------------|--------------------|---------------|------------|
| History alcohol intake during this pregnancy | Yes                 | 65 (17.9)          | 12 (17.6)     | 77 (17.8)  |
|                                              | No                  | 299 (82.1)         | 56 (82.4)     | 355 (82.2) |
| Type of alcohol                              | Local               | 49 (75.4)          | 8 (66.7)      | 57 (74.0)  |
|                                              | Bear                | 16 (24.6)          | 4 (33.3)      | 20 (29.0)  |
| History of coffee intake in this pregnancy   | Yes                 | 326 (89.6)         | 63 (92.4)     | 389 (90.0) |
|                                              | No                  | 38 (10.4)          | 5 (7.6)       | 43 (10.0)  |
| Number cups of coffee per day                | One cup             | 83 (25.5)          | 10 (15.9)     | 93 (23.9)  |
|                                              | Two cups            | 110 (33.7)         | 16 (25.4)     | 126 (32.4) |
|                                              | Three cups          | 79 (24.2)          | 16 (25.4)     | 95 (24.4)  |
|                                              | Four and above cups | 54 (16.7)          | 21 (33.3)     | 75 (19.3)  |
| Physical activity status during pregnancy    | Low                 | 156 (49.7)         | 42 (61.8)     | 198 (45.8) |
|                                              | Moderate            | 144 (39.6)         | 20 (29.4)     | 164 (38.0) |
|                                              | High                | 64 (17.6)          | 6 (8.8)       | 70 (16.2)  |
| Antenatal depression status                  | Probable depression | 24 (6.6)           | 20 (29.4)     | 44 (10.2)  |
|                                              | Possible depression | 43 (11.8)          | 13 (19.1)     | 56 (12.9)  |
|                                              | No depression       | 297(81.6)          | 35 (51.5)     | 332 (76.9) |
| Dietary diversity score                      | < 5 (inadequate)    | 18 (4.9)           | 9 (13.2)      | 27 (6.3)   |
|                                              | ≥ 5(adequate)       | 346 (95.1)         | 59 (86.8)     | 405 (93.7) |

Low physical activity was reported to be higher among non-GDM than GDM pregnant women (49.7% vs. 61.8%). Pregnant women with GDM were shown to have a higher proportion of antenatal depression when compared with non-GDM (29.4 vs. 6.6 %). Similarly, inadequate dietary diversity was revealed to be higher among GDM when compared to non-GDM pregnant women (4.9-13.2%) (Table 4).

### Incidence of GDM

During the study period, 432 pregnant women were followed for 4781 weeks. A total of 68 pregnant women developed GDM. The mean time of diagnosis of GDM is 26.1 (95% CI 25.65 to 26.51) weeks of pregnancy. The overall incidence rate of GDM was 14.22 per 1000 weeks of follow-ups, and the cumulative incidence was 15.7% (95%: (12.3, 19.2%) over 5 months.

### Predictors of GDM among pregnant women.

The adjusted log-binomial regression model has indicated that being unemployed [aRR=2.73; 95%CI:(1.36, 5.47)], having family history of diabetes [aRR = 3.01; 95% CI: (2.09– 4.35)], low physical activity [aRR = 2.43; 95% CI: (1.11, 5.32)], inadequate dietary diversity [aRR = 1.48; 95% CI: (1.29, 1.92)], anemia [aRR=2.51; 95% CI: (1.32, 3.54)] and antenatal depression [aRR =4.95; 95% CI: (3.35, 7.31)] were significantly associated with GDM (Table 5).

Table 5: Bivariate and multivariable log-binomial regression analysis and predictors of GDM among pregnant women attending antenatal care at health centers, Goba town, southeast Ethiopia: April to September 2021 (n=432)

| Variables                  | Non-GDM (n=364) | GDM (n=68) | cRR (95% CI) | aRR (95% CI)        |                      |
|----------------------------|-----------------|------------|--------------|---------------------|----------------------|
| Age in years               | < 25            | 159        | 23           | 1                   | 1                    |
|                            | 25-29           | 120        | 21           | 1.18 (0.68, 2.04)   | 1.36 (0.80, 2.33)    |
|                            | 30-34           | 52         | 13           | 1.58 (0.85, 2.94)   | 1.53 (0.84, 2.77)    |
|                            | >34             | 33         | 11           | 1.98 (1.04, 3.75) + | 1.84 (0.96, 3.50)    |
| Occupational status        | Employed        | 91         | 8            | 1                   | 1                    |
|                            | Non-employed    | 273        | 60           | 2.23 (1.10, 4.5) ++ | 2.73 (1.36, 5.47) ** |
| Family history of Diabetes | Yes             | 17         | 10           | 2.59 (1.49, 4.47) + | 3.01(2.09, 4.35) **  |
|                            | No              | 347        | 58           | 1                   | 1                    |
|                            | Total           | 364        | 68           |                     |                      |
| hemoglobin status          | < 11mg/dl       | 35         | 15           | 2.16 (1.32, 3.54) + | 2.51 (1.70, 3.69) ** |
|                            | ≥ 11mg/dl       | 329        | 53           | 1                   | 1                    |
|                            | Total           | 364        | 68           |                     |                      |



|                                            |                     |     |    |                                |                      |
|--------------------------------------------|---------------------|-----|----|--------------------------------|----------------------|
| History of coffee intake in this pregnancy | Yes                 | 326 | 63 | 1.39 (0.59, 3.27)              |                      |
|                                            | No                  | 38  | 5  | 1                              |                      |
|                                            | Total               | 364 | 68 |                                |                      |
| Number of cups coffee per day              | One cup             | 83  | 10 | 1                              | 1                    |
|                                            | Two cups            | 110 | 16 | 1.18 (0.56, 2.48)              | 1.09 (0.44, 2.29)    |
|                                            | Three cups          | 79  | 16 | 1.57 (0.75, 3.27)              | 1.85(0.91, 3.77)     |
|                                            | Four and above cups | 54  | 21 | 2.60 (1.30, 5.19) +            | 2.54 (1.38, 5.06) *  |
| Physical activity status during pregnancy  | Low                 | 156 | 42 | 2.71 (1.26, 5.82) <sup>+</sup> | 2.43 (1.11, 5.32)*   |
|                                            | Moderate            | 144 | 20 | 0.57(0.35, 0.94) +             | 1.98 (0.88,4.47)     |
|                                            | High                | 64  | 6  | 1                              | 1                    |
| Antenatal depression status                | Probable depression | 24  | 20 | 4.31(2.75, 6.77) ++            | 4.95 (3.35, 7.31) ** |
|                                            | Possible depression | 43  | 13 | 2.20 (1.24, 3.89) +            | 2.12 (1.21, 3.71) *  |
| Dietary diversity score                    | < 5                 | 18  | 9  | 1.57 (1.09, 2.62) <sup>+</sup> | 1.48 (1.29,1.92)**   |
|                                            | ≥ 5                 | 346 | 59 | 1                              | 1                    |

aRR = \*\*p-value < 0.001 \*p-value < 0.05, cRR = ++p-value < 0.001 +p-value < 0.05

## Discussion

The objective of this study was to determine the incidence of GDM and associated factors among women attending antenatal care in health centers, Goba town, southeast Ethiopia. In this study, the cumulative incidence of GDM among pregnant women attending ANC in health centers of Goba town was found to be 15.7%. Our finding was almost similar to study conducted in Gondar town, Ethiopia (12.8%) (9) and Qingdao, China (17%)(32). The current finding was higher than the study conducted in Wolita Zone, Ethiopia (4.2%)(10). The possible reason might be the difference in the sample size. Nevertheless, it was lower than a study conducted in Tanzania in which the cumulative incidence was identified to be 19.5% (33). Similarly, the current finding was lower than the study conducted in Nigeria, in which the prevalence of GDM was 21.2% (34). A further study conducted in Hadiya Zone, Ethiopia, revealed a higher incidence than our finding (26.2%)(11). This shows that the incidence of GDM is increasing as of other chronic medical conditions, which have been increasing with lifestyle modification. The variation might be variation in sample size and other sociodemographic variables.

Unemployment was shown to have a significant statistical association with GDM. As revealed in this study, non-employed pregnant women were 2.73 times as high as the risk of developing

1  
2  
3 GDM compared with the employed pregnant women. The current finding disagreed with a study  
4 conducted in Gondar town (9). The variation might be because of the difference in  
5 sociodemographic characteristics. Further, among unemployed women low physical activity  
6 was shown to have a difference in non-GDM and GDM pregnant women (46%vs 67%),  
7 respectively. This is difference supported by the evidence that employed adults were more likely  
8 to be physically active than non-employed (35) (36), similarly employed pregnant women were  
9 physically active compared with the non-employed group (37). Physical inactivity, in turn,  
10 increases the risk of developing GDM (38). In this finding, pregnant women with low physical  
11 activity were 2.43 times at risk of developing GDM than pregnant women who performed high  
12 physical activity. This finding is supported by a study conducted in Gondar town (9) and Amhara  
13 region, Ethiopia (21). Similarly, a study conducted in Tanzania has identified low physical  
14 activities as a risk factor for GDM (39).

24 The risk of developing GDM was 2.6 times higher in pregnant women with a family history of  
25 diabetes than their counterparts. This finding agreed with a prospective cohort study conducted  
26 in Florida which revealed that the risk of GDM among women having a family history of  
27 diabetes was increased by two-fold (40). Similarly, a study in Poland (Poznan city) identified  
28 family history of diabetes as an independent risk factor for GDM (41). This association could be  
29 because GDM has a genetic component that may predispose individuals to develop glucose  
30 intolerance during pregnancy, and type 2 diabetes shares a common genetic background with  
31 GDM (42).

39 Anemia was also shown to have an association with the occurrence of GDM. Our finding  
40 indicated that pregnant women with anemia were 1.9 times at risk of developing GDM compared  
41 with non-anemic pregnant women. The was finding supported by a study conducted in Tanzania  
42 that revealed pregnant women with anemia were at increased risk of developing GDM (20).  
43 Even though we do not have data that support anemia management with iron supplementatinon  
44 increase risk of GDM, there are some evidence that supports women who have anemia being  
45 supplemented with iron, which accumulates more than required, and over accumulated iron  
46 stored during pregnancy will elevate the risk of developing GDM (43). Further increased ferritin,  
47 hemoglobin, and dietary heme intake were associated with an increased risk of GDM (44).



1  
2  
3 The probability of developing GDM was 3.1 times in the pregnant women who reported  
4 antenatal depression symptoms than those with no depression symptoms. The present result  
5 supported a study conducted in Chicago which revealed that women with GDM were 3.79 times  
6 more likely to have a history of depression (45). Similarly, a cohort study conducted in Canada  
7 has reported a two-fold increased risk of depression among GDM women than in non GDM (46).  
8 The possible explanation could be depression results in hypercortisolemia, increasing insulin  
9 resistance (47).

10  
11  
12 In this study, pregnant women with inadequate dietary diversity were 1.5 times at risk of  
13 developing GDM than those with adequate dietary diversity. The finding agreed with the study  
14 conducted in Gondar town, where pregnant women with inadequate dietary diversity were at risk  
15 of developing GDM (9). This observation can be because inadequate dietary diversity will  
16 decrease the probability of getting a high-fiber diet that controls blood sugar levels (48). Further,  
17 inadequate dietary diversity decreases the chance of getting antioxidants in food consumed,  
18 which is important to prevent or delay b-cell dysfunction in diabetes by protecting against  
19 glucose toxicity (49).

### 20 21 22 **Limitations of the study**

23  
24 First, in this study fasting plasma glucose is used to diagnose GDM due to lack of resources for  
25 oral glucose tolerance test that might affect the strength of recommendations, however different  
26 studies reported fasting plasma glucose (FPG) as the most sensitive and specific test (50,51) and  
27 recommended to be conducted in resource-limited settings (50). Second, pre-pregnancy  
28 anthropometric measurement and BMI were not determined among pregnant women which may  
29 be part of the determinant factors.

### 30 31 32 **Conclusion**

33  
34 The cumulative incidence of GDM was relatively higher in Goba town. Having antenatal  
35 depression symptoms, anemia, a family history of diabetes, low physical activity, inadequate  
36 dietary diversity, and being unemployed, were identified as risk factors for the occurrence of  
37 GDM. Therefore, it is important to increase community awareness on the importance of physical  
38 exercise, increasing recreational activities, and diversifying food intake during pregnancy. The  
39 study's findings would be an input for decision-makers to combat GDM in Ethiopia.

## Acknowledgments

First and foremost, we would like to thank all the participants of this study, data collectors. Also, we would like to extend our sincere gratitude to Madda Walabu University for providing the financial support.

**Authors Contributors:** DA has made substantial contributions to conception and design, acquisition of data, analysis, and interpretation of data. He has written the draft manuscript and provided final approval of the version to be published. BS, TA, WN, AT, TR, YT, AM, ZT, DS, HG, KB, DZ, AT, FD, FN, GB, ZS, ZF, ZR and VKC have made substantial contributions to the design, acquisition of data, analysis, and interpretation of data. Additionally revised the article critically for important intellectual content and provided final approval of the version to be published. All authors read and approved the final manuscript.

**Funding:** The data collection was supported by Madda Walabu University grant number (Pr/89/699)

**Disclaimer:** The funders had no role in the study design, data collection and analysis, decision to publish or preparation of the manuscript.

**Competing interests:** None declared.

**Patient consent for publication:** Not required.

**Ethical approval:** The research protocol was approved by Ethical Review Committee, Madda Walabu University (Reference no: RDD/0097/13). All methods were conducted following the relevant tenets of the Helsinki Declaration. An official letter was obtained from the Goba town health office. Then, the letters were given to the Harawa Sinja Health Center and the Oda Baha Health Center heads. Finally, written consent was obtained from each study participant after explaining the risk and benefit of participating in the study. The privacy of the respondents was protected though out the data collection process, and anonymity and confidentiality of the data were maintained.

**Data availability statement:** Data are available upon reasonable request. All data relevant to the study are included in the article or uploaded as supplemental information. Data will be available upon request from the corresponding authors.

## Figure legend /caption

Figure 1: Flow diagram of outcome ascertainment for pregnant women on ANC from April 30 to September 30, 2021.

## Reference

1. WHO. Diagnostic Criteria and Classification of Hyperglycaemia First Detected in Pregnancy. 2013.
2. Macaulay S, Dunger D, Norris S. Gestational Diabetes Mellitus in Africa : A Systematic Review. *PLoS One*. 2014;9(6):1–11.
3. Solomon CG, Willett WC, Carey VJ, Rich-Edwards J, Hunter DJ, Colditz GA. Gestational Diabetes Mellitus Prospective Study of Pregravid Determinants of. *JAMA*. 1997;278(13):1078–83.
4. Habtewold TD, Tsega WD, Wale BY. Diabetes Mellitus in Outpatients in Debre Berhan Referral Hospital , Ethiopia. *J Diabetes Res*. 2016;2016.
5. IDF Diabetes Atlas Committee. The Global Burden of diabetes. 2013.
6. International Diabetes Federation. *Idf diabetes atlas*. 2019.
7. Muche AA, Olayemi OO, Gete YK. Prevalence and determinants of gestational diabetes mellitus in Africa based on the updated international diagnostic criteria: A systematic review and meta-analysis. *Arch Public Heal*. 2019;77(1):1–20.
8. Jaffe A, Giveon S, Rubin C, Novikov I, Ziv A, Kalter O. Gestational diabetes risk in a multi - ethnic population. *Acta Diabetol [Internet]*. 2020;57(3):263–9. Available from: <https://doi.org/10.1007/s00592-019-01404-8>
9. Muche AA, Olayemi OO, Gete YK. Prevalence of gestational diabetes mellitus and associated factors among women attending antenatal care at Gondar town public health facilities , Northwest Ethiopia. *BMC*. 2019;19(334):1–13.
10. Wolka E, Deressa W, Reja A, Woticha EW, Deressa W, Reja A. Prevalence of gestational diabetes mellitus and associated factors in Southern Ethiopia. *Asian J Med Sci*. 2018;10(1):86–91.
11. Larebo YM, Ermolo NA. Prevalence and Risk Factors of Gestational Diabetes Mellitus among Women Attending Antenatal Care in Hadiya Zone Public Hospitals, Southern Nation Nationality People Region. *Biomed Res Int*. 2021;2021:1–10.
12. Karaçam Z, Çelik D. The prevalence and risk factors of gestational diabetes mellitus in Turkey: a systematic review and meta-analysis. *J Matern Neonatal Med*. 2021;34(8):1331–41.
13. Yaping X, Chunhong L, Huifen Z, Fengfeng H, Huibin H, Meijing Z. Risk factors associated with gestational diabetes mellitus: a retrospective case-control study. *Int J Diabetes Dev Ctries*. 2021;
14. Wakwoya EB, Amante TD, Tesema KF. Gestational Diabetes Mellitus Is a Risk for Macrosomia : Case- Control Study in Eastern Ethiopia. 2018;
15. Asmamaw A, Olayemi OO, Kebede Y. Gestational diabetes mellitus increased the risk of adverse neonatal outcomes : A prospective cohort study in Northwest Ethiopia. *Midwifery J*. 2020;87.
16. Chivese T, Norris SA, Levitt NS. Progression to type 2 diabetes mellitus and associated risk factors after hyperglycemia first detected in pregnancy: A cross-sectional study in Cape Town, South Africa. *PLoS Med*. 2019;16(9):1–18.
17. Muche AA, Olayemi OO, Gete YK. Predictors of postpartum glucose intolerance in women with gestational diabetes mellitus : a prospective cohort study in Ethiopia based on the updated

- 1  
2  
3 diagnostic criteria. *BMJ Open*. 2020;10:1–8.  
4
- 5 18. Malhotra A, Stewart A. Gestational diabetes and the neonate: challenges and solutions. *Res*  
6 *Reports Neonatol*. 2015;31.  
7
- 8 19. Larrabure-Torrealva GT, Martinez S, Luque-Fernandez MA, Sanchez SE, Mascaro PA, Ingar H, et  
9 al. Prevalence and risk factors of gestational diabetes mellitus: Findings from a universal  
10 screening feasibility program in Lima, Peru. *BMC Pregnancy Childbirth*. 2018;18(1):1–9.  
11
- 12 20. Mwanri AW, Kinabo J, Ramaiya K, Feskens EJM. Prevalence of gestational diabetes mellitus in  
13 urban and rural Tanzania. *Diabetes Res Clin Pract* [Internet]. 2013;103(1):71–8. Available from:  
14 <http://dx.doi.org/10.1016/j.diabres.2013.11.021>  
15
- 16 21. Feleke BE. Determinants of Gestational Diabetes Mellitus, a case-control study. *J Matern*  
17 *Neonatal Med*. 2017;7.  
18
- 19 22. Teh WT, Teede HJ, Paul E, Harrison CL, Wallace EM, Allan C. Risk factors for gestational diabetes  
20 mellitus: Implications for the application of screening guidelines. *Aust New Zeal J Obstet*  
21 *Gynaecol*. 2011;51(1):26–30.  
22
- 23 23. Muche AA, Olayemi OO, Gete YK. Effects of gestational diabetes mellitus on risk of adverse  
24 maternal outcomes : a prospective cohort study in Northwest Ethiopia. *BMC Pregnancy*  
25 *Childbirth*. 2020;20(73):1–13.  
26
- 27 24. Wolka E, Deressa W, Reja A. Prevalence of gestational diabetes mellitus and associated factors in  
28 Southern Ethiopia. *ASIAN J Med Sci*. 2019;10(1).  
29
- 30 25. Hunt KJ, Schuller KL. The Increasing Prevalence of Diabetes in Pregnancy. *Obs Gynecol Clin N Am*.  
31 2007;34:173–99.  
32
- 33 26. Mwanri AW, Kinabo J, Ramaiya K, Feskens EJM. Gestational diabetes mellitus in sub-Saharan  
34 Africa: Systematic review and metaregression on prevalence and risk factors. *Trop Med Int Heal*.  
35 2015;20(8):983–1002.  
36
- 37 27. Central statistical Agency. Federal Democratic Republic of Ethiopia Central Statistical Agency  
38 Population Projection of Ethiopia for All Regions At Wereda Level from 2014 – 2017. 2014.  
39
- 40 28. FANTA. Minimum Dietary Diversity for Women: A Guide for Measurement [Internet]. 2016.  
41 Available from: <http://www.fao.org/3/a-i5486e.pdf>  
42
- 43 29. Matthey S, Barnett B, White T. The Edinburgh Postnatal Depression Scale. *Br J Psychiatry*.  
44 2003;182(4):368–368.  
45
- 46 30. Edwards MK, Loprinzi PD. Affective Responses to Acute Bouts of Aerobic Exercise, Mindfulness  
47 Meditation, and Combinations of Exercise and Meditation: A Randomized Controlled  
48 Intervention. *Psychol Rep*. 2019;122(2):465–84.  
49
- 50 31. Lapolla A, Chilelli NC, Dalfrà MG. New IADPSG recommendations: impact on care for gestational  
51 diabetes. *Diabetes Manag*. 2011;1(5):497–508.  
52
- 53 32. Li G, Wei T, Ni W, Zhang A, Zhang J, Xing Y, et al. Incidence and Risk Factors of Gestational  
54 Diabetes Mellitus: A Prospective Cohort Study in Qingdao, China. *Front Endocrinol (Lausanne)*.  
55 2020;11(September):1–9.  
56  
57  
58  
59  
60

- 1  
2  
3 33. Njete HI, John B, Mlay P, Mahande MJ, Msuya SE. Prevalence, predictors and challenges of  
4 gestational diabetes mellitus screening among pregnant women in northern Tanzania. *Trop Med*  
5 *Int Heal*. 2018;23(2):236–42.  
6  
7 34. Abbey M, Kasso T. First Trimester Fasting Blood Glucose as a Screening Tool for Diabetes Mellitus  
8 in a Teaching Hospital Setting in Nigeria. *Asian J Med Heal*. 2018;10(4):1–9.  
9  
10 35. Amenu K, Gelibo T, Getnet M, Taddele T, Getachew T, Defar A. Magnitude and determinants of  
11 physical inactivity in Ethiopia : Evidence from 2015 Ethiopia National NCD Survey. *Ethiop J Heal*  
12 *Dev*. 2017;31.  
13  
14 36. Mengesha MM, Roba HS, Ayele BH, Beyene AS. Level of physical activity among urban adults and  
15 the socio-demographic correlates: A population-based cross-sectional study using the global  
16 physical activity questionnaire. *BMC Public Health*. 2019;19(1):1–11.  
17  
18 37. Hailemariam TT, Gebregiorgis YS, Gebremeskel BF, Haile TG, Spitznagle TM. Physical activity and  
19 associated factors among pregnant women in Ethiopia: Facility-based cross-sectional study. *BMC*  
20 *Pregnancy Childbirth*. 2020;20(1):1–11.  
21  
22 38. Mishra S, Kishore S. Effect of physical activity during pregnancy on gestational diabetes mellitus.  
23 *Indian J Endocrinol Metab*. 2018;22(5):661–71.  
24  
25 39. Mdoe MB, Kibusi SM, Munyogwa MJ, Ernest AI. Prevalence and predictors of gestational diabetes  
26 mellitus among pregnant women attending antenatal clinic in Dodoma region, Tanzania: An  
27 analytical cross-sectional study. *BMJ Nutr Prev Heal*. 2021;4(1):69–79.  
28  
29 40. Solomon CG, Willett WC, Carey VJ, Rich-Edwards J, Hunter DJ, Colditz GA, et al. A prospective  
30 study of pregravid determinants of gestational diabetes mellitus. *J Am Med Assoc*.  
31 1997;278(13):1078–83.  
32  
33 41. Lewandowska M. Gestational diabetes mellitus (GDM) risk for declared family history of diabetes,  
34 in combination with BMI categories. *Int J Environ Res Public Health*. 2021;18(13).  
35  
36 42. Kwak SH, Jang HC, Park KS. Finding Genetic Risk Factors of Gestational Diabetes. *Genomics*  
37 *Inform*. 2012;10(4):239.  
38  
39 43. Zhang C, Rawal S. Dietary iron intake, iron status, and gestational diabetes. *Am J Clin Nutr*.  
40 2017;106:1672S-1680S.  
41  
42 44. Kataria Y, Wu Y, Horskjær P de H, Mandrup-Poulsen T, Ellervik C. Iron status and gestational  
43 diabetes—a meta-analysis. *Nutrients*. 2018;10(5):1–15.  
44  
45 45. Byrn M, Penckofer S. The Relationship Between Gestational Diabetes and Antenatal Depression.  
46 *JOGNN - J Obstet Gynecol Neonatal Nurs*. 2015;44(2):246–55.  
47  
48 46. Pace R, Rahme E, Da Costa D, Dasgupta K. Association between gestational diabetes mellitus and  
49 depression in parents: A retrospective cohort study. *Clin Epidemiol*. 2018;10:1827–38.  
50  
51 47. Weber, Schweiger, Deuschle, Heuser. Major depression and impaired glucose tolerance.  
52 *Endocrinol Diabetes*. 2000;108(2000):187–90.  
53  
54 48. Reynolds AN, Akerman AP, Mann J. Dietary fibre and whole grains in diabetes management:  
55 Systematic review and meta-analyses. *PLoS Med* [Internet]. 2020;17(3):e1003053. Available  
56 from: <http://dx.doi.org/10.1371/journal.pmed.1003053>  
57

- 1  
2  
3 49. Kaneto H, Kajimoto Y, Miyagawa J ichiro, Matsuoka T aki, Fujitani Y, Umayahara Y, et al.  
4 Beneficial effects of antioxidants in diabetes: Possible protection of pancreatic  $\beta$ -cells against  
5 glucose toxicity. *Diabetes*. 1999;48(12):2398–406.  
6  
7 50. Saeedi M, Hanson U, Simmons D, Fadl H. Characteristics of different risk factors and fasting  
8 plasma glucose for identifying GDM when using IADPSG criteria: A cross-sectional study. *BMC*  
9 *Pregnancy Childbirth*. 2018;18(1):1–6.  
10  
11 51. Reyes-Muñoz E, Sandoval-Osuna NL, Reyes-Mayoral C, Ortega-González C, Martínez-Cruz N,  
12 Ramírez-Torres MA, et al. Sensitivity of fasting glucose for gestational diabetes mellitus screening  
13 in Mexican adolescents based on International Association of Diabetes and Pregnancy Study  
14 Groups criteria: A diagnostic accuracy study based on retrospective data analysis. *BMJ Open*.  
15 2018;8(4):1–7.  
16  
17  
18  
19  
20  
21  
22  
23  
24  
25  
26  
27  
28  
29  
30  
31  
32  
33  
34  
35  
36  
37  
38  
39  
40  
41  
42  
43  
44  
45  
46  
47  
48  
49  
50  
51  
52  
53  
54  
55  
56  
57  
58  
59  
60

1  
2  
3  
4  
5  
6  
7  
8  
9  
10  
11  
12  
13  
14  
15  
16  
17  
18  
19  
20  
21  
22  
23  
24  
25  
26  
27  
28  
29  
30  
31  
32  
33  
34  
35  
36  
37  
38  
39  
40  
41  
42  
43  
44  
45  
46  
47  
48  
49  
50  
51  
52  
53  
54  
55  
56  
57  
58  
59  
60

Figure 1: Flow diagram of outcome ascertainment for pregnant women on ANC from April 30<sup>th</sup> to 30<sup>th</sup> September 2021.

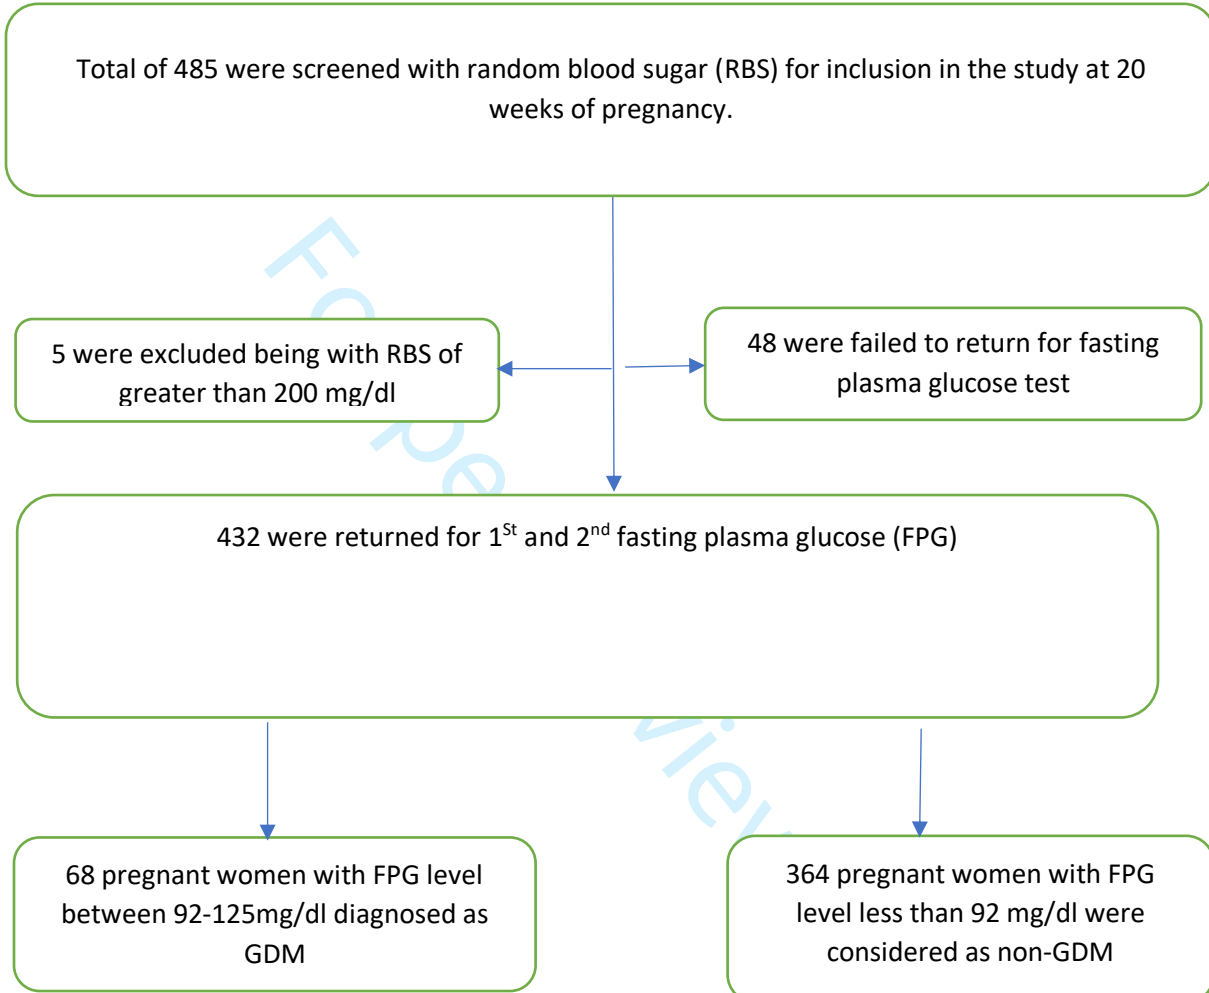

**STROBE 2007 (v4) Statement—Checklist of items that should be included in reports of *cohort studies***

| Section/Topic                | Item # | Recommendation                                                                                                                                                                       | Reported on page # |
|------------------------------|--------|--------------------------------------------------------------------------------------------------------------------------------------------------------------------------------------|--------------------|
| <b>Title and abstract</b>    | 1      | (a) Indicate the study's design with a commonly used term in the title or the abstract                                                                                               | 1                  |
|                              |        | (b) Provide in the abstract an informative and balanced summary of what was done and what was found                                                                                  | 2                  |
| <b>Introduction</b>          |        |                                                                                                                                                                                      |                    |
| Background/rationale         | 2      | Explain the scientific background and rationale for the investigation being reported                                                                                                 | 3/4                |
| Objectives                   | 3      | State specific objectives, including any prespecified hypotheses                                                                                                                     | 4                  |
| <b>Methods</b>               |        |                                                                                                                                                                                      |                    |
| Study design                 | 4      | Present key elements of study design early in the paper                                                                                                                              | 4                  |
| Setting                      | 5      | Describe the setting, locations, and relevant dates, including periods of recruitment, exposure, follow-up, and data collection                                                      | 4                  |
| Participants                 | 6      | (a) Give the eligibility criteria, and the sources and methods of selection of participants. Describe methods of follow-up                                                           | 4                  |
|                              |        | (b) For matched studies, give matching criteria and number of exposed and unexposed                                                                                                  | 4/5                |
| Variables                    | 7      | Clearly define all outcomes, exposures, predictors, potential confounders, and effect modifiers. Give diagnostic criteria, if applicable                                             | 5                  |
| Data sources/<br>measurement | 8*     | For each variable of interest, give sources of data and details of methods of assessment (measurement). Describe comparability of assessment methods if there is more than one group | 5                  |
| Bias                         | 9      | Describe any efforts to address potential sources of bias                                                                                                                            | 5                  |
| Study size                   | 10     | Explain how the study size was arrived at                                                                                                                                            | 5                  |
| Quantitative variables       | 11     | Explain how quantitative variables were handled in the analyses. If applicable, describe which groupings were chosen and why                                                         | 6                  |
| Statistical methods          | 12     | (a) Describe all statistical methods, including those used to control for confounding                                                                                                | 6                  |
|                              |        | (b) Describe any methods used to examine subgroups and interactions                                                                                                                  | 6                  |
|                              |        | (c) Explain how missing data were addressed                                                                                                                                          | 6                  |
|                              |        | (d) If applicable, explain how loss to follow-up was addressed                                                                                                                       | NA                 |
|                              |        | (e) Describe any sensitivity analyses                                                                                                                                                | NA                 |
| <b>Results</b>               |        |                                                                                                                                                                                      |                    |



|                          |     |                                                                                                                                                                                                              |          |
|--------------------------|-----|--------------------------------------------------------------------------------------------------------------------------------------------------------------------------------------------------------------|----------|
| Participants             | 13* | (a) Report numbers of individuals at each stage of study—eg numbers potentially eligible, examined for eligibility, confirmed eligible, included in the study, completing follow-up, and analysed            | 6        |
|                          |     | (b) Give reasons for non-participation at each stage                                                                                                                                                         | 6        |
|                          |     | (c) Consider use of a flow diagram                                                                                                                                                                           | figure 1 |
| Descriptive data         | 14* | (a) Give characteristics of study participants (eg demographic, clinical, social) and information on exposures and potential confounders                                                                     | 8        |
|                          |     | (b) Indicate number of participants with missing data for each variable of interest                                                                                                                          | 8        |
|                          |     | (c) Summarise follow-up time (eg, average and total amount)                                                                                                                                                  | 10       |
| Outcome data             | 15* | Report numbers of outcome events or summary measures over time                                                                                                                                               | 10       |
| Main results             | 16  | (a) Give unadjusted estimates and, if applicable, confounder-adjusted estimates and their precision (eg, 95% confidence interval). Make clear which confounders were adjusted for and why they were included | 10       |
|                          |     | (b) Report category boundaries when continuous variables were categorized                                                                                                                                    | NA       |
|                          |     | (c) If relevant, consider translating estimates of relative risk into absolute risk for a meaningful time period                                                                                             | 10       |
| Other analyses           | 17  | Report other analyses done—eg analyses of subgroups and interactions, and sensitivity analyses                                                                                                               | NA       |
| <b>Discussion</b>        |     |                                                                                                                                                                                                              |          |
| Key results              | 18  | Summarise key results with reference to study objectives                                                                                                                                                     | 12       |
| <b>Limitations</b>       |     |                                                                                                                                                                                                              |          |
| Interpretation           | 20  | Give a cautious overall interpretation of results considering objectives, limitations, multiplicity of analyses, results from similar studies, and other relevant evidence                                   | 13       |
| Generalisability         | 21  | Discuss the generalisability (external validity) of the study results                                                                                                                                        | 13       |
| <b>Other information</b> |     |                                                                                                                                                                                                              |          |
| Funding                  | 22  | Give the source of funding and the role of the funders for the present study and, if applicable, for the original study on which the present article is based                                                | 14       |

\*Give information separately for cases and controls in case-control studies and, if applicable, for exposed and unexposed groups in cohort and cross-sectional studies.

**Note:** An Explanation and Elaboration article discusses each checklist item and gives methodological background and published examples of transparent reporting. The STROBE checklist is best used in conjunction with this article (freely available on the Web sites of PLoS Medicine at <http://www.plosmedicine.org/>, Annals of Internal Medicine at <http://www.annals.org/>, and Epidemiology at <http://www.epidem.com/>). Information on the STROBE Initiative is available at [www.strobe-statement.org](http://www.strobe-statement.org).

# BMJ Open

## Incidence and risk factors of gestational diabetes mellitus in Goba town, Southeast Ethiopia: a prospective cohort study

|                                 |                                                                                                                                                                                                                                                                                                                                                                                                                                                                                                                                                                                                                                                                                                                                                                                                                                                                                                                                                                                                                                                                                                                                                                                             |
|---------------------------------|---------------------------------------------------------------------------------------------------------------------------------------------------------------------------------------------------------------------------------------------------------------------------------------------------------------------------------------------------------------------------------------------------------------------------------------------------------------------------------------------------------------------------------------------------------------------------------------------------------------------------------------------------------------------------------------------------------------------------------------------------------------------------------------------------------------------------------------------------------------------------------------------------------------------------------------------------------------------------------------------------------------------------------------------------------------------------------------------------------------------------------------------------------------------------------------------|
| Journal:                        | <i>BMJ Open</i>                                                                                                                                                                                                                                                                                                                                                                                                                                                                                                                                                                                                                                                                                                                                                                                                                                                                                                                                                                                                                                                                                                                                                                             |
| Manuscript ID                   | bmjopen-2021-060694.R1                                                                                                                                                                                                                                                                                                                                                                                                                                                                                                                                                                                                                                                                                                                                                                                                                                                                                                                                                                                                                                                                                                                                                                      |
| Article Type:                   | Original research                                                                                                                                                                                                                                                                                                                                                                                                                                                                                                                                                                                                                                                                                                                                                                                                                                                                                                                                                                                                                                                                                                                                                                           |
| Date Submitted by the Author:   | 29-Jul-2022                                                                                                                                                                                                                                                                                                                                                                                                                                                                                                                                                                                                                                                                                                                                                                                                                                                                                                                                                                                                                                                                                                                                                                                 |
| Complete List of Authors:       | Atlaw, Daniel; Madda Walabu University, ; Sahiledengle, Biniyam; Madda Walabu University, Public Health Assefa, Tesfaye ; Madda Walabu University Negash, Wogene ; Madda Walabu University Tahir, Anwar ; Madda Walabu University Regasa, Tadele ; Madda Walabu University Tekalegn, Yohannes; Madda Walabu University, Department of Public Health Mamo, Ayele ; Madda Walabu University Enegeda , zinash; Madda Walabu University Solomon, Damtew ; Madda Walabu University Gezahegn, Habtamu ; Madda Walabu University Bekele, Kebebe; Madda Walabu University Zenbaba, Demisu; Madda Walabu University, Public Health; Madda Walabu University, Public health Desta, Fikreab; Madda Walabu University, Public health Tasew, Alealign ; Madda Walabu University Nugusu, Fikadu ; Madda Walabu University Beressa, Girma; Madda Walabu University, Public Health; Jimma University, Public Health Shiferaw, Zerihun ; Madda Walabu University Feleke, Zegeye ; Madda Walabu University Regassa, Zegeye ; Madda Walabu University, Nursing Duguma, Negesso; Madda Walabu University Chattu, Vijay Kumar; Saveetha University Saveetha Medical College and Hospital, Department of Medicine |
| <b>Primary Subject Heading</b>: | Diabetes and endocrinology                                                                                                                                                                                                                                                                                                                                                                                                                                                                                                                                                                                                                                                                                                                                                                                                                                                                                                                                                                                                                                                                                                                                                                  |
| Secondary Subject Heading:      | Epidemiology, Obstetrics and gynaecology                                                                                                                                                                                                                                                                                                                                                                                                                                                                                                                                                                                                                                                                                                                                                                                                                                                                                                                                                                                                                                                                                                                                                    |
| Keywords:                       | Diabetes in pregnancy < DIABETES & ENDOCRINOLOGY, Antenatal < GENETICS, Diabetes & endocrinology < INTERNAL MEDICINE                                                                                                                                                                                                                                                                                                                                                                                                                                                                                                                                                                                                                                                                                                                                                                                                                                                                                                                                                                                                                                                                        |
|                                 |                                                                                                                                                                                                                                                                                                                                                                                                                                                                                                                                                                                                                                                                                                                                                                                                                                                                                                                                                                                                                                                                                                                                                                                             |

1  
2  
3  
4  
5  
6  
7  
8  
9  
10  
11  
12  
13  
14  
15  
16  
17  
18  
19  
20  
21  
22  
23  
24  
25  
26  
27  
28  
29  
30  
31  
32  
33  
34  
35  
36  
37  
38  
39  
40  
41  
42  
43  
44  
45  
46  
47  
48  
49  
50  
51  
52  
53  
54  
55  
56  
57  
58  
59  
60

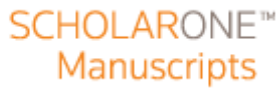

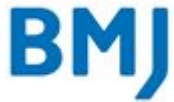

I, the Submitting Author has the right to grant and does grant on behalf of all authors of the Work (as defined in the below author licence), an exclusive licence and/or a non-exclusive licence for contributions from authors who are: i) UK Crown employees; ii) where BMJ has agreed a CC-BY licence shall apply, and/or iii) in accordance with the terms applicable for US Federal Government officers or employees acting as part of their official duties; on a worldwide, perpetual, irrevocable, royalty-free basis to BMJ Publishing Group Ltd ("BMJ") its licensees and where the relevant Journal is co-owned by BMJ to the co-owners of the Journal, to publish the Work in this journal and any other BMJ products and to exploit all rights, as set out in our [licence](#).

The Submitting Author accepts and understands that any supply made under these terms is made by BMJ to the Submitting Author unless you are acting as an employee on behalf of your employer or a postgraduate student of an affiliated institution which is paying any applicable article publishing charge ("APC") for Open Access articles. Where the Submitting Author wishes to make the Work available on an Open Access basis (and intends to pay the relevant APC), the terms of reuse of such Open Access shall be governed by a Creative Commons licence – details of these licences and which [Creative Commons](#) licence will apply to this Work are set out in our licence referred to above.

Other than as permitted in any relevant BMJ Author's Self Archiving Policies, I confirm this Work has not been accepted for publication elsewhere, is not being considered for publication elsewhere and does not duplicate material already published. I confirm all authors consent to publication of this Work and authorise the granting of this licence.

1  
2  
3 **Incidence and risk factors of gestational diabetes mellitus in Goba town,**  
4 **Southeast Ethiopia: a prospective cohort study**  
5  
6  
7

8  
9 **Daniel Atlaw<sup>1</sup>, Biniyam Sahiledengle<sup>2</sup>, Tesfaye Assefa<sup>3</sup>, Wogene Negash<sup>3</sup>, Anwar Tahir<sup>3</sup>, Tadele**  
10 **Regasa<sup>1</sup>, Yohannes Tekalign<sup>2</sup>, Ayele Mamo<sup>4</sup>, Zinash Teferu<sup>2</sup>, Damtew Solomon<sup>1</sup>, Habtamu**  
11 **Gezahegn<sup>1</sup>, Kebebe Bekele<sup>5</sup>, Demisu Zenbaba<sup>2</sup>, Alelign Tasew<sup>2</sup>, Fikreab Desta<sup>2</sup>, Fikadu Nugusu<sup>2</sup>,**  
12 **Girma Beressa<sup>2</sup>, Zerihun Shiferaw<sup>1</sup>, Zegeye Feleke<sup>3</sup>, Zegeye Regassa<sup>3</sup>, Negesso Duguma<sup>6</sup>, Vijay**  
13 **Kumar Chattu<sup>7</sup>**  
14

15 1Biomedical Department, Madda Walabu University, Goba Referral Hospital, Bale Goba, Ethiopia  
16 2Public Health Department, Madda Walabu University, Goba Referral Hospital, Bale Goba, Ethiopia  
17 3Nursing Department, Madda Walabu University, Goba Referral Hospital, Bale Goba, Ethiopia  
18 4Pharmacy Department, Madda Walabu University, Goba Referral Hospital, Bale Goba, Ethiopia  
19 5Surgery Department, Madda Walabu University, Goba Referral Hospital, Bale Goba, Ethiopia  
20 6Department of laboratory, Madda Walabu University, Goba Referral Hospital, Bale Goba, Ethiopia  
21 7Center for Transdisciplinary Research, Saveetha Medical College and Hospitals, SIMATS, Saveetha  
22 University, Chennai 600077– India  
23

24  
25 Corresponding author

26 DA: [danielatmwu@gmail.com](mailto:danielatmwu@gmail.com)  
27  
28  
29  
30  
31  
32  
33  
34  
35  
36  
37  
38  
39  
40  
41  
42  
43  
44  
45  
46  
47  
48  
49  
50  
51  
52  
53  
54  
55  
56  
57  
58  
59  
60

## Abstract

**Objective:** Gestational diabetes mellitus (GDM) increases the risk of perinatal morbidity. Gestational diabetes mellitus pregnant women receiving is becoming a public health concern in low and middle-income countries (LMICs), and it is known to cause severe morbidity for mothers and newborns. Hence, this study aimed to assess the incidence and predictors of gestational diabetes mellitus among antenatal care (ANC) in Goba town.

**Design:** A prospective cohort study.

**Setting:** Goba town health centers in southeast Ethiopia.

**Participants:** 480 pregnant women on ANC follow-up from 30<sup>th</sup> April to 30<sup>th</sup> September 2021.

**Primary and secondary outcome:** Incidence and risk factors of gestational diabetes mellitus using fasting capillary blood glucose.

**Results:** The cumulative incidence of GDM in this study was 15.7% [95% CI: (12.3, 19.2)]. Being unemployed [adjusted relative risk (aRR) = 2.73, 95% CI: (1.36, 5.47)], having a family history of diabetes [aRR = 3.01; 95% CI: (2.09,4.35)], low physical activity [aRR = 2.43, 95%CI: (1.11, 5.32)], inadequate dietary diversity [aRR = 1.48,95%CI: (1.29,1.92)], anemia [aRR=2.51; 95% CI: (1.32, 3.54)] and antenatal depression [aRR =4.95; 95% CI: (3.35, 7.31)] were significantly associated with GDM.

**Conclusion:** The cumulative incidence of GDM was relatively high. Having antenatal depression symptoms, low physical activity, inadequate dietary diversity, being unemployed, anemia, and a family history of DM were identified as significant risk factors GDM.

**Keywords:** Gestational diabetes mellitus, pregnant women, risk factors, Ethiopia

### Strength and limitations of the study

- To our knowledge, this is the first prospective cohort study conducted on GDM in the southeast Ethiopia.
- In this study, fasting capillary blood glucose is used to diagnose GDM.
- Oral glucose tolerance test (OGTT) was not determined due to resource limitation.
- Pre-pregnancy anthropometric measurement and BMI were not determined among pregnant women, which might be part of predictor variables.

## Background

Gestational diabetes mellitus (GDM) is a glucose intolerance detected during pregnancy for the first time (1). Pregnancy itself induces changes in maternal glucose metabolism and insulin sensitivity, thereby increasing the demand for insulin production (2). The common period for the diagnosis of GDM is between 24 to 28 weeks of gestation (3). However, hyperglycemia during early pregnancy was identified as a risk factor for developing GDM(4). Therefore, determining blood glucose level as early as possible is important to decrease adverse pregnancy outcomes (5,6).

Diabetes mellitus (DM) and other non-communicable diseases are becoming more prevalent in developing countries, including Ethiopia (7). Globally, diabetes prevalence is increasing rapidly, estimated 381 million in 2013 to 422 million living with DM in 2015. According to the international diabetes federation (IDF), by 2035, the global burden of DM is projected to reach 592 million, or one in ten, will have DM (8). The International Diabetes Federation estimates that 16.2% of live births to women had some form of hyperglycemia in pregnancy (9). In sub-Saharan Africa (SSA), the burden of GDM was found to be 14.28% (10). In Ethiopia, women are at greater risk of GDM despite having a lower mean body mass index (BMI) (11). In a study conducted in Gondar town, the cumulative incidence was 12.8% (12). Other studies conducted in Wolita and Hadiya zones, the southern part of Ethiopia reported the cumulative incidence of GDM to be 4.2% (13) and 26.2% (14), respectively.

Gestational diabetes mellitus is associated with a greater risk of neonatal macrosomia (15,16), shoulder dystocia, neonatal trauma, respiratory distress, and increased admission to neonatal intensive care units (17). Women with hyperglycemia detected during early pregnancy are at greater risk of adverse pregnancy outcomes (4), with an incidence of 30.3% (18). These include high blood pressure and birth difficulties, with the baby more prone to fractures and nerve damage (9). Gestational diabetes mellitus also results in permanent type 2 diabetes mellitus (T2DM) in women, with an incidence ranging from 2.6% to 70% (19,20).

A higher prevalence of GDM was observed in mothers with a family history of T2DM (16,21,22). Further, a study conducted on Russian women also identified that a genetic variant in MTNR1B is associated with an increased risk of GDM (23). Previous stillbirth, high mid-upper arm circumference (MUAC), anemia (24,25), advanced maternal age (26), low physical activity,

1  
2  
3 and a sedentary lifestyle have also been shown to increase the risk of GDM (22,27). A higher  
4 BMI, abdominal circumference and fasting glycemia in the first trimester of pregnancy revealed  
5 a 13-fold increased risk of GDM(28). The proportion of gestational diabetes mellitus increases  
6 with the number of pregnancies (29).  
7  
8  
9

10 In most cases, adverse pregnancy outcomes among women with GDM are preventable by  
11 optimizing glycemic control. Early screening and treatment of mothers with GDM can minimize  
12 the complications for both mothers and their babies (17). Once diagnosed with GDM, a woman  
13 has a substantial chance of developing T2DM following delivery, with some studies reporting a  
14 5-year cumulative incidence rate of over 50% (30).  
15  
16  
17  
18

19 Despite all the above facts, there are only a few studies on the incidence and associated factors of  
20 GDM in SSA (31), including in Ethiopia, particularly in the study setting. Therefore, we aimed  
21 to assess the incidence and predictors of GDM among pregnant women receiving antenatal care  
22 in southeast Ethiopia.  
23  
24  
25  
26  
27

## 28 **Methods**

### 29 **Study design and setting**

30 A facility-based prospective follow-up study was conducted among pregnant women in health  
31 centers of Goba town from April 30<sup>th</sup> to September 30<sup>th</sup>, 2021. The pregnant women were  
32 followed from 20 weeks of gestation to 32 weeks. Goba is one of the administrative towns in the  
33 Bale zone, located 445km from Addis Ababa city. According to the 2019 fiscal year, the total  
34 population of Goba town was 51,562 and the estimated number of pregnant women was 1789  
35 (32). The town has two health centers and one referral hospital. The health centers in Goba town  
36 serve more than three-fourths of pregnant women for antenatal care (ANC) follow-up.  
37  
38  
39  
40  
41  
42  
43

### 44 **Source population**

45 All pregnant women who started ANC were followed-up at Harawa Sinja and Oda Baha Health  
46 Center, Goba town, southeast Ethiopia.  
47  
48  
49  
50

### 51 **Study population**

52 Pregnant women with a gestational age of 20 weeks who were on ANC at Harawa Sinja and Oda  
53 Baha Health Center, Goba town, Southeast Ethiopia.  
54  
55  
56  
57



### Inclusion criteria

Pregnant women who are in their 20 weeks of gestation, singleton pregnancy, permanent residents of the study area, and without any known pre-existing or overt diabetes mellitus (DM).

### Exclusion criteria

Pregnant women who took medications that could affect glucose metabolisms, such as steroids, beta-adrenergic agonists, and anti-psychotic medications, and who have an acute febrile illness were excluded.

### Sample size determination and sampling techniques

Sample size estimation was determined using Epi Info version 7 software, taking into account the following statistical assumptions: The proportion of the previous history of stillbirths in the non-exposed and exposed groups was 5.17% and 14%, respectively, at a confidence level of 95% (2-sided), power of 80%, and exposed to the non-exposed ratio of 1:2 (12). Considering the loss to follow-up of 15%, the minimum sample size required for the study was 480 pregnant women (Table 1). All pregnant women with a gestational age of 20 weeks were included in this study until the required sample size has reached.

Table 1: Sample size calculation for different associated factors

| Exposure variables        | Exposed to non-exposed ratio | Event in the non-exposed vs exposed | Power of the study | Crude odds ratio | Total sample size |
|---------------------------|------------------------------|-------------------------------------|--------------------|------------------|-------------------|
| Family history of DM (12) | 1:2                          | 5.17% vs 14%                        | 80                 | 2.97             | 417               |
| History of abortion (13)  | 1:2                          | 16.3% vs 45.5%                      | 80                 | 4.2              | 101               |
| previous GDM(25)          | 1:2                          | 1.8% vs 12%                         | 80                 | 7.4              | 236               |

All pregnant women on ANC follow-up at two health centers in Goba town who fulfilled our inclusion criteria were included in the study.

## Variables of the study

### Dependent variable

**Gestational diabetes mellitus** :- Defined as Fasting capillary blood glucose between 92 to 125 mg/dl(1).

### Exposure variables

Sociodemographic variables such as pregnant women's age, occupation, religion, ethnicity, and educational status; behavioral variables (caffeine, alcohol, dietary diversity and smoking); reproductive related factors; a previous medical history of (GDM, pregnancy-induced hypertension, stillbirth, intrauterine fetal death, and spontaneous abortion); health-related (chronic disease); and family history of T2DM and GDM were considered in this study.

### Data collection procedures

An interviewer-administered, structured questionnaire was prepared in English and translated into the local language 'Amharic and Afan Oromo.' The questionnaire was back-translated into English to assure consistency. The questionnaire was checked by language experts (MA holders in language). Midwifery with a Bachelor of Science degree was involved in the data collection activity. Three days of training were provided to data collectors to familiarize them with the study objectives, data collection methods, ethical issues, and the questionnaire.

Both primary and secondary data (chart review) were collected. The baseline maternal and socio-demographic characteristics, behavioral, dietary diversity, and antenatal depression status were collected using face-to-face interviews. Dietary diversity was assessed using a 24-hour food recall method by the Food and Nutrition Technical Assistance (FANTA) 2016 version of the woman's minimum dietary diversity measurement tool. The four or less minimum dietary diversity score (MDDS) was categorized as inadequate dietary diversity (33).

The Edinburgh Postnatal Depression Scale (EPDS) screening tool was utilized to assess antenatal depression in the past week (34). The short form of the International Physical Activity Questionnaire (IPAQ) was employed to assess the physical activities of the last seven days. Then, using metabolic equivalents (MET-minutes per week) of the IPAQ scoring protocol, pregnant women were categorized into high, moderate, and low levels of physical activity (35).

1  
2  
3 Fasting capillary blood glucose was performed for all pregnant women by capillary blood  
4 glucose, using a standard plasma-calibrated glucometer (Hemo Cue Glucose B-201+ (Sweden)).  
5 Even though, the sensitivity of capillary blood glucose is lower than venous blood glucose, the  
6 international consensus is that it is acceptable in resource-poor settings for GDM diagnosis (3).  
7 Initially, a capillary blood glucose test (random blood glucose) was performed for all pregnant  
8 women at 20 weeks of gestation to rule out the presence of pre-existing or overt DM. Then  
9 screening for GDM using fasting capillary blood glucose was performed at 24-28 weeks of  
10 gestational age (Figure 1). A similar measurement was repeated at 32 weeks of gestation to  
11 identify the late occurrence of GDM. Participants diagnosed with GDM were referred  
12 immediately (linked) to health care providers who are experts in managing GDM. Follow-ups  
13 were assured through the public health facilities in close collaboration with experts and data  
14 collectors.  
15  
16  
17  
18  
19  
20  
21  
22  
23

### 24 **Outcome ascertainment**

25  
26 In this study, initially, pregnant women were invited to participate. Then screened for pre-  
27 existing DM using random capillary blood glucose. Pregnant women who were identified to  
28 have random capillary blood glucose greater than 200mg/dl, have excluded from the study.  
29 Finally, the included pregnant women were undergone fasting capillary blood glucose  
30 measurement. Pregnant women with fasting capillary blood glucose between 92-125mg/dl were  
31 diagnosed as GDM and pregnant women with fasting capillary blood glucose level less than 92  
32 mg/dl declared as non-GDM.  
33  
34  
35  
36  
37  
38  
39

### 40 **Data quality control**

41 The data quality was assured by applying a properly designed and pre-tested questionnaire. The  
42 tool was pre-tested on five percent of the sample size at the Baha Biftu health center one week  
43 before the actual data collection to establish its ability to elicit relevant information. In addition,  
44 the researchers ensured proper categorization and coding of the questions. The investigators and  
45 a supervisor conducted regular supervision and follow-up. In addition, a regular check-up for  
46 completeness and consistency of the data was undertaken daily. Incomplete questionnaires were  
47 completed during the second appointment. The manufacturer's instructions and standard  
48 operating procedures were strictly followed for all blood glucose measurements.  
49  
50  
51  
52  
53  
54  
55  
56  
57

## Data processing and analysis

The questionnaires were coded manually. The data were entered into Epi-data version 3.1 and then exported from Epi-data to Stata 14 for analysis. Data were checked for missing values. Descriptive statistics were presented using frequencies, percentages, mean and standard deviations to describe study subjects. Multicollinearity was checked by looking at values of variance inflation factors ( $VIF < 7$ ). Bivariate log-binomial regression analysis was employed to examine the relationship between the outcome and independent variables. All the variables with  $p \leq 0.2$  in the bivariate log-binomial regression analyses were entered into a multivariable log-binomial regression model. This step helps to identify important associated factors for the dependent variables after controlling possible confounding factors. The crude and adjusted relative risk was used to estimate the strength of the association between predictors and outcome variables. Variables with a p-value  $< 0.05$  were considered statistically significant with the outcome variable.

## Patient and public involvement

Patients and the public were not involved in the planning, designing, and interpreting of the analysed data.

## Ethical considerations

The research protocol was approved by the Ethical Review Committee of Madda Walabu University (Reference no: RDD/0097/13). All methods were conducted following the relevant tenets of the Helsinki Declaration. An official letter was obtained from the Goba town health office. Then, the letters were given to the Harawa Sinja Health Center and the Oda Baha Health Center heads. Finally, written consent was obtained from each study participant after explaining the study's risks and benefits. The privacy of the respondents was secured throughout the data collection process, and anonymity and confidentiality of the data were maintained.

## Results

### Sociodemographic and economic characteristics of pregnant women

In this study, 500 pregnant women were invited to participate. Of the invited, 485 agreed to participate and were screened for pre-existing DM using random capillary blood glucose. Five

pregnant women were identified to have random capillary blood glucose greater than 200mg/dl, therefore excluded from the study. Of the remaining 480 pregnant women, 48 were lost from follow-up. The remaining 432 pregnant women were undergone fasting capillary blood glucose measurements. Sixty-eight pregnant women were identified to have fasting capillary blood glucose levels between 92-125mg/dl, while 364 pregnant women had capillary blood glucose levels less than 92mg/dl (figure 1).

The study included a total of 432 pregnant women, making the response rate 90%. The mean age of the pregnant women was 26.58 (SD  $\pm$  5.88) years. Most of the participants (97.8%) were married, (88.9%) were from the Oromo ethnic group, and nearly half (47.5%) were Muslim in religion. One hundred thirty-seven (31.7%) women had attended secondary school education, while about 80.5% of pregnant women were unemployed (Table 2).

Table 2: Sociodemographic and economic characteristics of pregnant women attending ANC follow-up at health centers of Goba town, southeast Ethiopia: April to September 2021 (n=432)

| Variables           |                     | Non-GDM n (%) | GDM n(%)  | p.value |
|---------------------|---------------------|---------------|-----------|---------|
| Age in years        | < 25                | 159 (43.7)    | 23 (33.8) | .027    |
|                     | 25-29               | 120 (33.0)    | 21(30.9)  |         |
|                     | 30-34               | 52 (14.3)     | 13 (19.1) |         |
|                     | >34                 | 33 (9.1)      | 11(16.2)  |         |
| Religion            | Orthodox            | 157 (43.1)    | 28 (41.1) | .733    |
|                     | Muslim              | 173 (47.5)    | 32 (47.1) |         |
|                     | Protestant          | 34 (9.3)      | 8 (11.8)  |         |
| Ethnicity           | Oromo               | 293 (80.5)    | 55 (80.9) | .990    |
|                     | Amhara              | 61 (16.8)     | 11(16.2)  |         |
|                     | Others              | 10 (2.7)      | 2(2.9)    |         |
| Educational status  | No formal education | 53 (14.6)     | 11(16.3)  | .538    |
|                     | Primary school      | 117 (32.1)    | 19 (27.9) |         |
|                     | Secondary school    | 118 (32.4)    | 19 (27.9) |         |
|                     | Collage and above   | 76 (20.9)     | 19 (27.9) |         |
| Occupational status | Employed            | 60 (16.5)     | 24 (35.3) | .017    |
|                     | Non employed        | 304 (83.5)    | 44 (64.7) |         |

\*Others (Gurage, Wolita)

### Clinical characteristics of study participants

The mean systolic blood pressure was 105.9 (SD  $\pm$  10.2) mmHg, and diastolic blood pressure was 66.4 (SD  $\pm$  7.6) mmHg. The pregnant women's mean hemoglobin and random blood glucose levels were 11.9 (SD  $\pm$ 1.1) and 108 (SD  $\pm$ 16.7), respectively. Nearly one-third (33.8%) of the

women were primigravida. Twenty-seven (6.3%) had a family history of diabetes mellitus. Fifty (11.6%) pregnant women were identified to have anemia. The previous history of abortion and stillbirth were reported among 3 and 3.8% of pregnant women, respectively (Table 3).

Table 3: Obstetric history of study participant attending ANC follow-up at health centers of Goba town, southeast Ethiopia: April to September 2021 (n=432)

| Variables                                                                                 |                | Non-GDM<br>(n=364) | GDM (n=68) | P-value |
|-------------------------------------------------------------------------------------------|----------------|--------------------|------------|---------|
| Gravidity                                                                                 | One            | 143 (39.3)         | 23 (33.9)  | .515    |
|                                                                                           | Two            | 99 (27.2)          | 22 (32.4)  |         |
|                                                                                           | Three          | 68 (18.6)          | 11(16.2)   |         |
|                                                                                           | Four and above | 54 (14.3)          | 12(17.6)   |         |
| History of abortion/<br>Intrauterine fetal death                                          | Yes            | 5 (2.3)            | 3 (6.7)    | .115    |
|                                                                                           | No             | 216 (97.7)         | 42 (93.3)  |         |
| History of Stillbirth                                                                     | Yes            | 8 (3.6)            | 2 (4.4)    | .791    |
|                                                                                           | No             | 213 (96.4)         | 43 (95.6)  |         |
| History of confirmed<br>PIH(pregnancy-induced<br>hypertension) in a<br>previous pregnancy | Yes            | 12 (5.4)           | 2 (4.4)    | .787    |
|                                                                                           | No             | 209 (94.6)         | 43 (95.6)  |         |
| History of confirmed<br>GDM in a previous<br>pregnancy                                    | Yes            | 2 (0.9)            | 1 (2.2)    | .446    |
|                                                                                           | No             | 119 (91.1)         | 44 (97.8)  |         |
| Family history of Diabetes                                                                | Yes            | 17 (4.7)           | 10 (14.7)  | .002    |
|                                                                                           | No             | 347 (95.3)         | 58 (85.3)  |         |
| Hemoglobin status                                                                         | < 11mg/dl      | 35 (9.6)           | 15 (22.1)  | .003    |
|                                                                                           | ≥11mg/dl       | 329 (90.4)         | 53 (77.9)  |         |

A slightly higher proportion of diabetes family history was revealed among women with GDM than non-GDM (14.7% vs. 4.7%). When pregnant women were compared in terms of anemia status, those with GDM had a higher proportion than non-GDM (22.1% vs. 9.6%) (Table 3).

### Behavioral and lifestyle characteristics of pregnant mothers

Out of total participants, alcohol and coffee intake during pregnancy was reported by (17.8%) and (90%), respectively. Nearly one-third of women who consumed coffee, reported consuming two cups of coffee per day. Most pregnant women (45.8%) reported having low physical activity, while about one in ten pregnant women reported having probable antenatal depression

symptoms. An inadequate dietary diversity score was reported in 6.3% of pregnant women participating in this study (Table 4).

Table 4: Behavioral characteristics of study participant attending ANC follow-up at health centers of Goba town, southeast Ethiopia 2021(n=432)

| Variable                                     |                     | Non-GDM<br>(n=364) | GDM<br>(n=68) | P-Value |
|----------------------------------------------|---------------------|--------------------|---------------|---------|
| History alcohol intake during this pregnancy | Yes                 | 65 (17.9)          | 12 (17.6)     | .967    |
|                                              | No                  | 299 (82.1)         | 56 (82.4)     |         |
| Type of alcohol                              | Local               | 49 (75.4)          | 8 (66.7)      | .527    |
|                                              | Bear                | 16 (24.6)          | 4 (33.3)      |         |
| History of coffee intake in this pregnancy   | Yes                 | 326 (89.6)         | 63 (92.4)     | .435    |
|                                              | No                  | 38 (10.4)          | 5 (7.6)       |         |
| Number cups of coffee per day                | One cup             | 83 (25.5)          | 10 (15.9)     | .002    |
|                                              | Two cups            | 110 (33.7)         | 16 (25.4)     |         |
|                                              | Three cups          | 79 (24.2)          | 16 (25.4)     |         |
|                                              | Four and above cups | 54 (16.7)          | 21 (33.3)     |         |
| Physical activity status during pregnancy    | Low                 | 156 (49.7)         | 42 (61.8)     | .013    |
|                                              | Moderate            | 144 (39.6)         | 20 (29.4)     |         |
|                                              | High                | 64 (17.6)          | 6 (8.8)       |         |
| Antenatal depression status                  | Probable depression | 24 (6.6)           | 20 (29.4)     | .000    |
|                                              | Possible depression | 43 (11.8)          | 13 (19.1)     |         |
|                                              | No depression       | 297(81.6)          | 35 (51.5)     |         |
| Dietary diversity score                      | < 5 (inadequate)    | 18 (4.9)           | 9 (13.2)      | .010    |
|                                              | ≥ 5(adequate)       | 346 (95.1)         | 59 (86.8)     |         |

Low physical activity was reported to be higher among GDM than non-GDM pregnant women ( 61.8% vs. 49.7% ). Pregnant women with GDM were shown to have a higher proportion of antenatal depression when compared with non-GDM (29.4 vs. 6.6 %). Similarly, inadequate dietary diversity was revealed to be higher among GDM when compared to non-GDM pregnant women (4.9-13.2%) (Table 4).

### Incidence of GDM

During the study period, 432 pregnant women were followed for 4781 weeks. A total of 68 pregnant women developed GDM. The mean time of diagnosis of GDM is 26.1 (95% CI 25.65



to 26.51) weeks of pregnancy. The overall incidence rate of GDM was 14.22 per 1000 weeks of follow-ups, and the cumulative incidence was 15.7% (95%: (12.3, 19.2%) over 5 months.

### Predictors of GDM among pregnant women.

After adjustment for maternal age, employment status, family history of diabetes, hemoglobin status, physical activity, antenatal depression, and dietary diversity. The adjusted log-binomial regression model has indicated that being unemployed [adjusted relative risk (aRR) =2.73; 95%CI:(1.36, 5.47)], having family history of diabetes [aRR = 3.01; 95% CI: (2.09– 4.35)], low physical activity [aRR = 2.43; 95% CI: (1.11, 5.32)], inadequate dietary diversity [aRR = 1.48; 95% CI: (1.29, 1.92)], anemia [aRR=2.51; 95% CI: (1.32, 3.54)] and antenatal depression [aRR =4.95; 95% CI: (3.35, 7.31)] were significantly associated with GDM (Table 5).

Table 5: Bivariate and multivariable log-binomial regression analysis and predictors of GDM among pregnant women attending antenatal care at health centers, Goba town, southeast Ethiopia: April to September 2021 (n=432)

| Variables                                  |                     | Non-GDM<br>(n=364) | GDM<br>(n=68) | Crude relative risk<br>(cRR) (95% CI) | adjusted relative risk<br>(aRR) (95% CI) |
|--------------------------------------------|---------------------|--------------------|---------------|---------------------------------------|------------------------------------------|
| Age in years                               | < 25                | 159                | 23            | 1                                     | 1                                        |
|                                            | 25-29               | 120                | 21            | 1.18 (0.68, 2.04)                     | 1.36 (0.80, 2.33)                        |
|                                            | 30-34               | 52                 | 13            | 1.58 (0.85, 2.94)                     | 1.53 (0.84, 2.77)                        |
|                                            | >34                 | 33                 | 11            | 1.98 (1.04, 3.75) +                   | 1.84 (0.96, 3.50)                        |
| Occupational status                        | Employed            | 91                 | 8             | 1                                     | 1                                        |
|                                            | Non-employed        | 273                | 60            | 2.23 (1.10, 4.5) ++                   | 2.73 (1.36, 5.47) **                     |
| Family history of Diabetes                 | Yes                 | 17                 | 10            | 2.59 (1.49, 4.47) +                   | 3.01(2.09, 4.35) **                      |
|                                            | No                  | 347                | 58            | 1                                     | 1                                        |
|                                            | Total               | 364                | 68            |                                       |                                          |
| hemoglobin status                          | < 11mg/dl           | 35                 | 15            | 2.16 (1.32, 3.54) +                   | 2.51 (1.70, 3.69) **                     |
|                                            | ≥ 11mg/dl           | 329                | 53            | 1                                     | 1                                        |
|                                            | Total               | 364                | 68            |                                       |                                          |
| History of coffee intake in this pregnancy | Yes                 | 326                | 63            | 1.39 (0.59, 3.27)                     |                                          |
|                                            | No                  | 38                 | 5             | 1                                     |                                          |
|                                            | Total               | 364                | 68            |                                       |                                          |
| Number of cups of coffee per day           | One cup             | 83                 | 10            | 1                                     |                                          |
|                                            | Two cups            | 110                | 16            | 1.18 (0.56, 2.48)                     |                                          |
|                                            | Three cups          | 79                 | 16            | 1.57 (0.75, 3.27)                     |                                          |
|                                            | Four and above cups | 54                 | 21            | 2.60 (1.30, 5.19) +                   |                                          |
| Physical activity status                   | Low                 | 156                | 42            | 2.71 (1.26, 5.82)+                    | 2.43 (1.11, 5.32)*                       |
|                                            | Moderate            | 144                | 20            | 0.57(0.35, 0.94) +                    | 1.98 (0.88,4.47)                         |



|                             |                     |     |    |                                |                                 |
|-----------------------------|---------------------|-----|----|--------------------------------|---------------------------------|
| during pregnancy            | High                | 64  | 6  | 1                              | 1                               |
| Antenatal depression status | Probable depression | 24  | 20 | 4.31(2.75, 6.77) <sup>++</sup> | 4.95 (3.35, 7.31) <sup>**</sup> |
|                             | Possible depression | 43  | 13 | 2.20 (1.24, 3.89) <sup>+</sup> | 2.12 (1.21, 3.71) <sup>*</sup>  |
| Dietary diversity score     | < 5                 | 18  | 9  | 1.57 (1.09, 2.62) <sup>+</sup> | 1.48 (1.29,1.92) <sup>**</sup>  |
|                             | ≥ 5                 | 346 | 59 | 1                              | 1                               |

aRR = <sup>\*\*</sup>p-value < 0.001    <sup>\*</sup>p-value < 0.05,    cRR = <sup>++</sup>p-value < 0.001    <sup>+</sup>p-value < 0.05

## Discussion

Our study aimed to determine the incidence of GDM and associated factors among women attending antenatal care in health centers Goba town, southeast Ethiopia. In this study, the cumulative incidence of GDM among pregnant women attending ANC in health centers of Goba town was 15.7%. Our finding was almost similar to studies conducted in Gondar town, Ethiopia (12.8%) (12) and Qingdao, China (17%) (36). The current finding was higher than the study conducted in Wolita Zone, Ethiopia (4.2%) (13). The possible reason might be the difference in the sample size. Nevertheless, it was lower than a study conducted in Tanzania in which the cumulative incidence was found to be 19.5% (37). The cumulative incidence of GDM in this study was lower than the findings from a Nigerian study which was reported 21.2% (38). Another study conducted in Hadiya Zone, Ethiopia, revealed a higher incidence than our finding (26.2%) (14). These figures show that the incidence of GDM is increasing as other chronic medical conditions, which have been increasing with lifestyle shifts such as consuming fast food and increasing sedentary lifestyle. The variation might be variation in sample size and other sociodemographic variables.

Unemployment was shown to have a significant statistical association with GDM. As revealed in this study, non-employed pregnant women had a 2.73 times higher risk of developing GDM than employed pregnant women. The current finding disagreed with a study conducted in Gondar town (12). The variation might be because of the difference in sociodemographic characteristics. Further, among unemployed women, low physical activity was shown to have a difference in non-GDM and GDM pregnant women (46% vs 67%), respectively. This difference is supported by the evidence that employed adults were more likely to be physically active than non-employed (39) (40). Similarly, employed pregnant women were physically active compared with

1  
2  
3 the non-employed group (41). Physical inactivity, in turn, increases the risk of developing GDM  
4 (42). In this study, pregnant women with low physical activity were 2.43 times at risk of GDM  
5 than pregnant women who performed high physical activity. This finding is supported by a study  
6 conducted in Gondar town (12) and Amhara region, Ethiopia (25). Another study from Tanzania  
7 has identified low physical activity as a risk factor for GDM (43).  
8  
9

10  
11  
12 The risk of developing GDM was 2.6 times higher in pregnant women with a family history of  
13 diabetes than in their counterparts. This finding agreed with a prospective cohort study  
14 conducted in Florida which revealed that the risk of GDM among women with a family history  
15 of DM increased two-fold (44). Similarly, a study in Poland (Poznan city) identified family  
16 history of diabetes as an independent risk factor for GDM (45). This association could be  
17 because GDM has a genetic component that may predispose individuals to glucose intolerance  
18 during pregnancy, and T2DM shares a common genetic background with GDM (46).  
19  
20  
21

22  
23  
24  
25 Anemia was also shown to have an association with the occurrence of GDM. Our finding  
26 indicated that pregnant women with anemia were 1.9 times at risk of developing GDM compared  
27 with non-anemic pregnant women. The finding is supported by a study conducted in Tanzania  
28 that revealed pregnant women with anemia were at increased risk of developing GDM (24).  
29 Although there is no evidence to suggest that managing anemia with iron supplementation  
30 increases the risk of GDM, some evidence suggests that pregnant women who get iron  
31 supplements for anemia have excess iron deposited during pregnancy and are at increased risk of  
32 developing GDM (47). Further increased ferritin, hemoglobin, and dietary heme intake were  
33 associated with an increased risk of GDM (48).  
34  
35  
36  
37  
38  
39  
40

41  
42 The probability of developing GDM was 3.1 times in the pregnant women who reported  
43 antenatal depression symptoms than those with no depression symptoms. The present result  
44 supported a study conducted in Chicago which revealed that women with GDM were 3.79 times  
45 more likely to have a history of depression (49). Similarly, a cohort study conducted in Canada  
46 has reported a two-fold increased risk of depression among GDM women than in non-GDM  
47 (50). The possible explanation could be depression results in hypercortisolemia, increasing  
48 insulin resistance (51).  
49  
50  
51  
52  
53

54  
55 In this study, pregnant women with inadequate dietary diversity were 1.5 times at risk of  
56 developing GDM than those with adequate dietary diversity. The finding agreed with the study  
57

1  
2  
3 conducted in Gondar town, where pregnant women with inadequate dietary diversity were at risk  
4 of developing GDM (12). This observation can be because inadequate dietary diversity will  
5 decrease the probability of getting a high-fiber diet that controls blood sugar levels (52). Further,  
6 inadequate dietary diversity decreases the chance of getting antioxidants in food consumed,  
7 which is important to prevent or delay b-cell dysfunction in diabetes by protecting against  
8 glucose toxicity (53).  
9

10  
11  
12  
13  
14 Our study has identified a few limitations. Firstly, we used fasting capillary blood glucose to  
15 diagnose GDM due to a lack of resources for oral glucose tolerance tests that might affect the  
16 strength of recommendations. However, various studies have reported fasting capillary glucose  
17 as the most sensitive and specific test (54,55) and recommended to be conducted in resource-  
18 limited settings (54). Secondly, even though capillary blood glucose is recommended in resource  
19 limited setting it is less sensitive than venous blood glucose. Thirdly, pre-pregnancy  
20 anthropometric measurement and BMI were not determined among pregnant women which may  
21 be part of the determinant factors.  
22  
23  
24  
25  
26  
27

## 28 **Conclusion**

29  
30  
31 The cumulative incidence of GDM was relatively high in Goba town. Having antenatal  
32 depression symptoms, anemia, a family history of diabetes, low physical activity, inadequate  
33 dietary diversity, and being unemployed, were identified as risk factors for GDM. Therefore,  
34 increasing community awareness of physical exercise, increasing recreational activities, and  
35 diversifying food intake during pregnancy is important. The study's findings would be an input  
36 for decision-makers to combat GDM in Ethiopia.  
37  
38  
39  
40  
41

## 42 **Acknowledgments**

43  
44 First and foremost, we would like to thank all the participants of this study, data collectors.  
45 Also, we would like to extend our sincere gratitude to Madda Walabu University for providing  
46 financial support.  
47

48  
49 **Authors Contributors:** DA has made substantial contributions to conception and design,  
50 acquisition of data, analysis, and interpretation of data. DA has written the draft manuscript and  
51 provided final approval of the version to be published. BS, TA, WN, AT, TR, YT, AM, ZT, DS,  
52 HG, KB, DZ, AT, FD, FN, GB, ZS, ZF, ZR, and VKC have made substantial contributions to the  
53 design, acquisition of data, analysis, and interpretation of data. All revised the article critically  
54  
55  
56  
57

1  
2  
3 for important intellectual content and provided final approval of the version to be published. All  
4 authors read and approved the final manuscript.

5  
6 **Funding:** The data collection was supported by Madda Walabu University grant number  
7 (Pr/89/699)

8  
9  
10 **Disclaimer:** The funders had no role in the study design, data collection, analysis, decision to  
11 publish or preparation of the manuscript.

12  
13 **Competing interests:** None declared.

14  
15 **Patient consent for publication:** Not required.

16  
17 **Ethical approval:** The research protocol was approved by Ethical Review Committee, Madda  
18 Walabu University (Reference no: RDD/0097/13). All methods were conducted following the  
19 relevant tenets of the Helsinki Declaration. An official letter was obtained from the Goba town  
20 health office. Then, the letters were given to the Harawa Sinja Health Center and the Oda Baha  
21 Health Center heads. Finally, written consent was obtained from each study participant after  
22 explaining the risk and benefits of participating in the study. The privacy of the respondents was  
23 protected though out the data collection process, and anonymity and confidentiality of the data  
24 were maintained.

25  
26  
27  
28 **Data availability statement:** the SPSS data used for this study will be available upon request  
29 from the corresponding authors.

### 30 31 **Figure legend /caption**

32  
33  
34 Figure 1: Flow diagram of outcome ascertainment for pregnant women on ANC from April 30 to  
35 September 30, 2021.

## 36 37 38 39 40 41 42 43 **Reference**

- 44  
45 1. WHO. Diagnostic Criteria and Classification of Hyperglycaemia First Detected in Pregnancy. 2013.
- 46  
47 2. Macaulay S, Dunger D, Norris S. Gestational Diabetes Mellitus in Africa : A Systematic Review.  
48 PLoS One. 2014;9(6):1–11.
- 49  
50 3. Simeoni U, Sobngwi E. The International Federation of Gynecology and Obstetrics ( F I G O )  
51 Initiative on gestational diabetes mellitus : A pragmatic guide for diagnosis , management , and  
52 care. Int J Gynecol Obstet J. 2015;3(131):173–211.
- 53  
54 4. Popova P, Tkachuch A, Dronova A, et al. Fasting glycemia at the first prenatal visit and pregnancy  
55 outcomes in Russian women. Minerva Endocrinol. 2016;41(4):477–85.
- 56  
57

- 1
  - 2
  - 3
  - 4
  - 5
  - 6
  - 7
  - 8
  - 9
  - 10
  - 11
  - 12
  - 13
  - 14
  - 15
  - 16
  - 17
  - 18
  - 19
  - 20
  - 21
  - 22
  - 23
  - 24
  - 25
  - 26
  - 27
  - 28
  - 29
  - 30
  - 31
  - 32
  - 33
  - 34
  - 35
  - 36
  - 37
  - 38
  - 39
  - 40
  - 41
  - 42
  - 43
  - 44
  - 45
  - 46
  - 47
  - 48
  - 49
  - 50
  - 51
  - 52
  - 53
  - 54
  - 55
  - 56
  - 57
  - 58
  - 59
  - 60
5. Popova P, Castorino K, Grineva EN, Kerr D. Gestational diabetes mellitus diagnosis and treatment goals: measurement and measures. *Minerva Endocrinol.* 2016;
6. Quaresima P, Visconti F, Chiefari E, Mirabelli M, Borelli M, Caroleo P, et al. Appropriate Timing of Gestational Diabetes Mellitus Diagnosis in Medium- and Low-Risk Women : Effectiveness of the Italian NHS Recommendations in Preventing Fetal Macrosomia. *J Diabetes Res Res.* 2020;2020.
7. Habtewold TD, Tsega WD, Wale BY. Diabetes Mellitus in Outpatients in Debre Berhan Referral Hospital , Ethiopia. *J Diabetes Res.* 2016;2016.
8. IDF Diabetes Atlas Committee. *The Global Burden of diabetes.* 2013.
9. International Diabetes Federation. *Idf diabetes atlas.* 2019.
10. Muche AA, Olayemi OO, Gete YK. Prevalence and determinants of gestational diabetes mellitus in Africa based on the updated international diagnostic criteria: A systematic review and meta-analysis. *Arch Public Heal.* 2019;77(1):1–20.
11. Jaffe A, Giveon S, Rubin C, Novikov I, Ziv A, Kalter O. Gestational diabetes risk in a multi - ethnic population. *Acta Diabetol [Internet].* 2020;57(3):263–9. Available from: <https://doi.org/10.1007/s00592-019-01404-8>
12. Muche AA, Olayemi OO, Gete YK. Prevalence of gestational diabetes mellitus and associated factors among women attending antenatal care at Gondar town public health facilities , Northwest Ethiopia. *BMC.* 2019;19(334):1–13.
13. Wolka E, Deressa W, Reja A, Woticha EW, Deressa W, Reja A. Prevalence of gestational diabetes mellitus and associated factors in Southern Ethiopia. *Asian J Med Sci.* 2018;10(1):86–91.
14. Larebo YM, Ermolo NA. Prevalence and Risk Factors of Gestational Diabetes Mellitus among Women Attending Antenatal Care in Hadiya Zone Public Hospitals, Southern Nation Nationality People Region. *Biomed Res Int.* 2021;2021:1–10.
15. Karaçam Z, Çelik D. The prevalence and risk factors of gestational diabetes mellitus in Turkey: a systematic review and meta-analysis. *J Matern Neonatal Med.* 2021;34(8):1331–41.
16. Yaping X, Chunhong L, Huifen Z, Fengfeng H, Huibin H, Meijing Z. Risk factors associated with gestational diabetes mellitus: a retrospective case-control study. *Int J Diabetes Dev Ctries.* 2021;
17. Wakwoya EB, Amante TD, Tesema KF. Gestational Diabetes Mellitus Is a Risk for Macrosomia : Case- Control Study in Eastern Ethiopia. 2018;
18. Asmamaw A, Olayemi OO, Kebede Y. Gestational diabetes mellitus increased the risk of adverse neonatal outcomes : A prospective cohort study in Northwest Ethiopia. *Midwifery J.* 2020;87.
19. Chivese T, Norris SA, Levitt NS. Progression to type 2 diabetes mellitus and associated risk factors after hyperglycemia first detected in pregnancy: A cross-sectional study in Cape Town, South Africa. *PLoS Med.* 2019;16(9):1–18.
20. Muche AA, Olayemi OO, Gete YK. Predictors of postpartum glucose intolerance in women with gestational diabetes mellitus : a prospective cohort study in Ethiopia based on the updated diagnostic criteria. *BMJ Open.* 2020;10:1–8.
21. Malhotra A, Stewart A. Gestational diabetes and the neonate: challenges and solutions. *Res*

- 1  
2  
3 Reports Neonatol. 2015;31.  
4
- 5 22. Larrabure-Torrealva GT, Martinez S, Luque-Fernandez MA, Sanchez SE, Mascaro PA, Ingar H, et  
6 al. Prevalence and risk factors of gestational diabetes mellitus: Findings from a universal  
7 screening feasibility program in Lima, Peru. *BMC Pregnancy Childbirth*. 2018;18(1):1–9.  
8
- 9 23. Popova P V, Klyushina AA, Vasilyeva LB, Tkachuk AS, Vasukova EA, Anopova AD, et al. Association  
10 of Common Genetic Risk Variants With Gestational Diabetes Mellitus and Their Role in GDM  
11 Prediction. *Front Endocrinol (Lausanne)*. 2021;12(April):1–7.  
12
- 13 24. Mwanri AW, Kinabo J, Ramaiya K, Feskens EJM. Prevalence of gestational diabetes mellitus in  
14 urban and rural Tanzania. *Diabetes Res Clin Pract [Internet]*. 2013;103(1):71–8. Available from:  
15 <http://dx.doi.org/10.1016/j.diabres.2013.11.021>  
16
- 17 25. Feleke BE. Determinants of Gestational Diabetes Mellitus, a case-control study. *J Matern  
18 Neonatal Med*. 2017;7.  
19
- 20 26. Teh WT, Teede HJ, Paul E, Harrison CL, Wallace EM, Allan C. Risk factors for gestational diabetes  
21 mellitus: Implications for the application of screening guidelines. *Aust New Zeal J Obstet  
22 Gynaecol*. 2011;51(1):26–30.  
23
- 24 27. Muche AA, Olayemi OO, Gete YK. Effects of gestational diabetes mellitus on risk of adverse  
25 maternal outcomes : a prospective cohort study in Northwest Ethiopia. *BMC Pregnancy  
26 Childbirth*. 2020;20(73):1–13.  
27
- 28 28. Popova Vp, Grineva E, Ryazantseva E, Shelepova E. The new combination of risk factors  
29 determining a high risk of gestational diabetes mellitus. *Minerva Endocrinol*. 2015;40(4):239–47.  
30
- 31 29. Wolka E, Deressa W, Reja A. Prevalence of gestational diabetes mellitus and associated factors in  
32 Southern Ethiopia. *ASIAN J Med Sci*. 2019;10(1).  
33
- 34 30. Hunt KJ, Schuller KL. The Increasing Prevalence of Diabetes in Pregnancy. *Obs Gynecol Clin N Am*.  
35 2007;34:173–99.  
36
- 37 31. Mwanri AW, Kinabo J, Ramaiya K, Feskens EJM. Gestational diabetes mellitus in sub-Saharan  
38 Africa: Systematic review and metaregression on prevalence and risk factors. *Trop Med Int Heal*.  
39 2015;20(8):983–1002.  
40
- 41 32. Central statistical Agency. Federal Democratic Republic of Ethiopia Central Statistical Agency  
42 Population Projection of Ethiopia for All Regions At Wereda Level from 2014 – 2017. 2014.  
43
- 44 33. FANTA. Minimum Dietary Diversity for Women: A Guide for Measurement [Internet]. 2016.  
45 Available from: <http://www.fao.org/3/a-i5486e.pdf>  
46
- 47 34. Matthey S, Barnett B, White T. The Edinburgh Postnatal Depression Scale. *Br J Psychiatry*.  
48 2003;182(4):368–368.  
49
- 50 35. Edwards MK, Loprinzi PD. Affective Responses to Acute Bouts of Aerobic Exercise, Mindfulness  
51 Meditation, and Combinations of Exercise and Meditation: A Randomized Controlled  
52 Intervention. *Psychol Rep*. 2019;122(2):465–84.  
53
- 54 36. Li G, Wei T, Ni W, Zhang A, Zhang J, Xing Y, et al. Incidence and Risk Factors of Gestational  
55 Diabetes Mellitus: A Prospective Cohort Study in Qingdao, China. *Front Endocrinol (Lausanne)*.  
56 2020;11(September):1–9.  
57



- 1
- 2
- 3
- 4 37. Njete HI, John B, Mlay P, Mahande MJ, Msuya SE. Prevalence, predictors and challenges of
- 5 gestational diabetes mellitus screening among pregnant women in northern Tanzania. *Trop Med*
- 6 *Int Heal*. 2018;23(2):236–42.
- 7
- 8 38. Abbey M, Kasso T. First Trimester Fasting Blood Glucose as a Screening Tool for Diabetes Mellitus
- 9 in a Teaching Hospital Setting in Nigeria. *Asian J Med Heal*. 2018;10(4):1–9.
- 10
- 11 39. Amenu K, Gelibo T, Getnet M, Taddele T, Getachew T, Defar A. Magnitude and determinants of
- 12 physical inactivity in Ethiopia : Evidence from 2015 Ethiopia National NCD Survey. *Ethiop J Heal*
- 13 *Dev*. 2017;31.
- 14
- 15 40. Mengesha MM, Roba HS, Ayele BH, Beyene AS. Level of physical activity among urban adults and
- 16 the socio-demographic correlates: A population-based cross-sectional study using the global
- 17 physical activity questionnaire. *BMC Public Health*. 2019;19(1):1–11.
- 18
- 19 41. Hailemariam TT, Gebregiorgis YS, Gebremeskel BF, Haile TG, Spitznagle TM. Physical activity and
- 20 associated factors among pregnant women in Ethiopia: Facility-based cross-sectional study. *BMC*
- 21 *Pregnancy Childbirth*. 2020;20(1):1–11.
- 22
- 23 42. Mishra S, Kishore S. Effect of physical activity during pregnancy on gestational diabetes mellitus.
- 24 *Indian J Endocrinol Metab*. 2018;22(5):661–71.
- 25
- 26 43. Mdoe MB, Kibusi SM, Munyogwa MJ, Ernest AI. Prevalence and predictors of gestational diabetes
- 27 mellitus among pregnant women attending antenatal clinic in Dodoma region, Tanzania: An
- 28 analytical cross-sectional study. *BMJ Nutr Prev Heal*. 2021;4(1):69–79.
- 29
- 30 44. Solomon G, Willett WC, Carey VJ, Rich-Edwards J, Hunter DJ, Colditz GA, et al. A prospective
- 31 study of pregravid determinants of gestational diabetes mellitus. *J Am Med Assoc*.
- 32 1997;278(13):1078–83.
- 33
- 34 45. Lewandowska M. Gestational diabetes mellitus (GDM) risk for declared family history of diabetes,
- 35 in combination with BMI categories. *Int J Environ Res Public Health*. 2021;18(13).
- 36
- 37 46. Kwak SH, Jang HC, Park KS. Finding Genetic Risk Factors of Gestational Diabetes. *Genomics*
- 38 *Inform*. 2012;10(4):239.
- 39
- 40 47. Zhang C, Rawal S. Dietary iron intake, iron status, and gestational diabetes. *Am J Clin Nutr*.
- 41 2017;106:1672S–1680S.
- 42
- 43 48. Kataria Y, Wu Y, Horskjær P de H, Mandrup-Poulsen T, Ellervik C. Iron status and gestational
- 44 diabetes—a meta-analysis. *Nutrients*. 2018;10(5):1–15.
- 45
- 46 49. Byrn M, Penckofer S. The Relationship Between Gestational Diabetes and Antenatal Depression.
- 47 *JOGNN - J Obstet Gynecol Neonatal Nurs*. 2015;44(2):246–55.
- 48
- 49 50. Pace R, Rahme E, Da Costa D, Dasgupta K. Association between gestational diabetes mellitus and
- 50 depression in parents: A retrospective cohort study. *Clin Epidemiol*. 2018;10:1827–38.
- 51
- 52 51. Weber, Schweiger, Deuschle, Heuser. Major depression and impaired glucose tolerance.
- 53 *Endocrinol Diabetes*. 2000;108(2000):187–90.
- 54
- 55 52. Reynolds AN, Akerman AP, Mann J. Dietary fibre and whole grains in diabetes management:
- 56 Systematic review and meta-analyses. *PLoS Med* [Internet]. 2020;17(3):e1003053. Available
- 57 from: <http://dx.doi.org/10.1371/journal.pmed.1003053>

- 1  
2  
3 53. Kaneto H, Kajimoto Y, Miyagawa J ichiro, Matsuoka T aki, Fujitani Y, Umayahara Y, et al.  
4 Beneficial effects of antioxidants in diabetes: Possible protection of pancreatic  $\beta$ -cells against  
5 glucose toxicity. *Diabetes*. 1999;48(12):2398–406.  
6  
7 54. Saeedi M, Hanson U, Simmons D, Fadl H. Characteristics of different risk factors and fasting  
8 plasma glucose for identifying GDM when using IADPSG criteria: A cross-sectional study. *BMC*  
9 *Pregnancy Childbirth*. 2018;18(1):1–6.  
10  
11 55. Reyes-Muñoz E, Sandoval-Osuna NL, Reyes-Mayoral C, Ortega-González C, Martínez-Cruz N,  
12 Ramírez-Torres MA, et al. Sensitivity of fasting glucose for gestational diabetes mellitus screening  
13 in Mexican adolescents based on International Association of Diabetes and Pregnancy Study  
14 Groups criteria: A diagnostic accuracy study based on retrospective data analysis. *BMJ Open*.  
15 2018;8(4):1–7.  
16  
17  
18  
19  
20  
21  
22  
23  
24  
25  
26  
27  
28  
29  
30  
31  
32  
33  
34  
35  
36  
37  
38  
39  
40  
41  
42  
43  
44  
45  
46  
47  
48  
49  
50  
51  
52  
53  
54  
55  
56  
57  
58  
59  
60



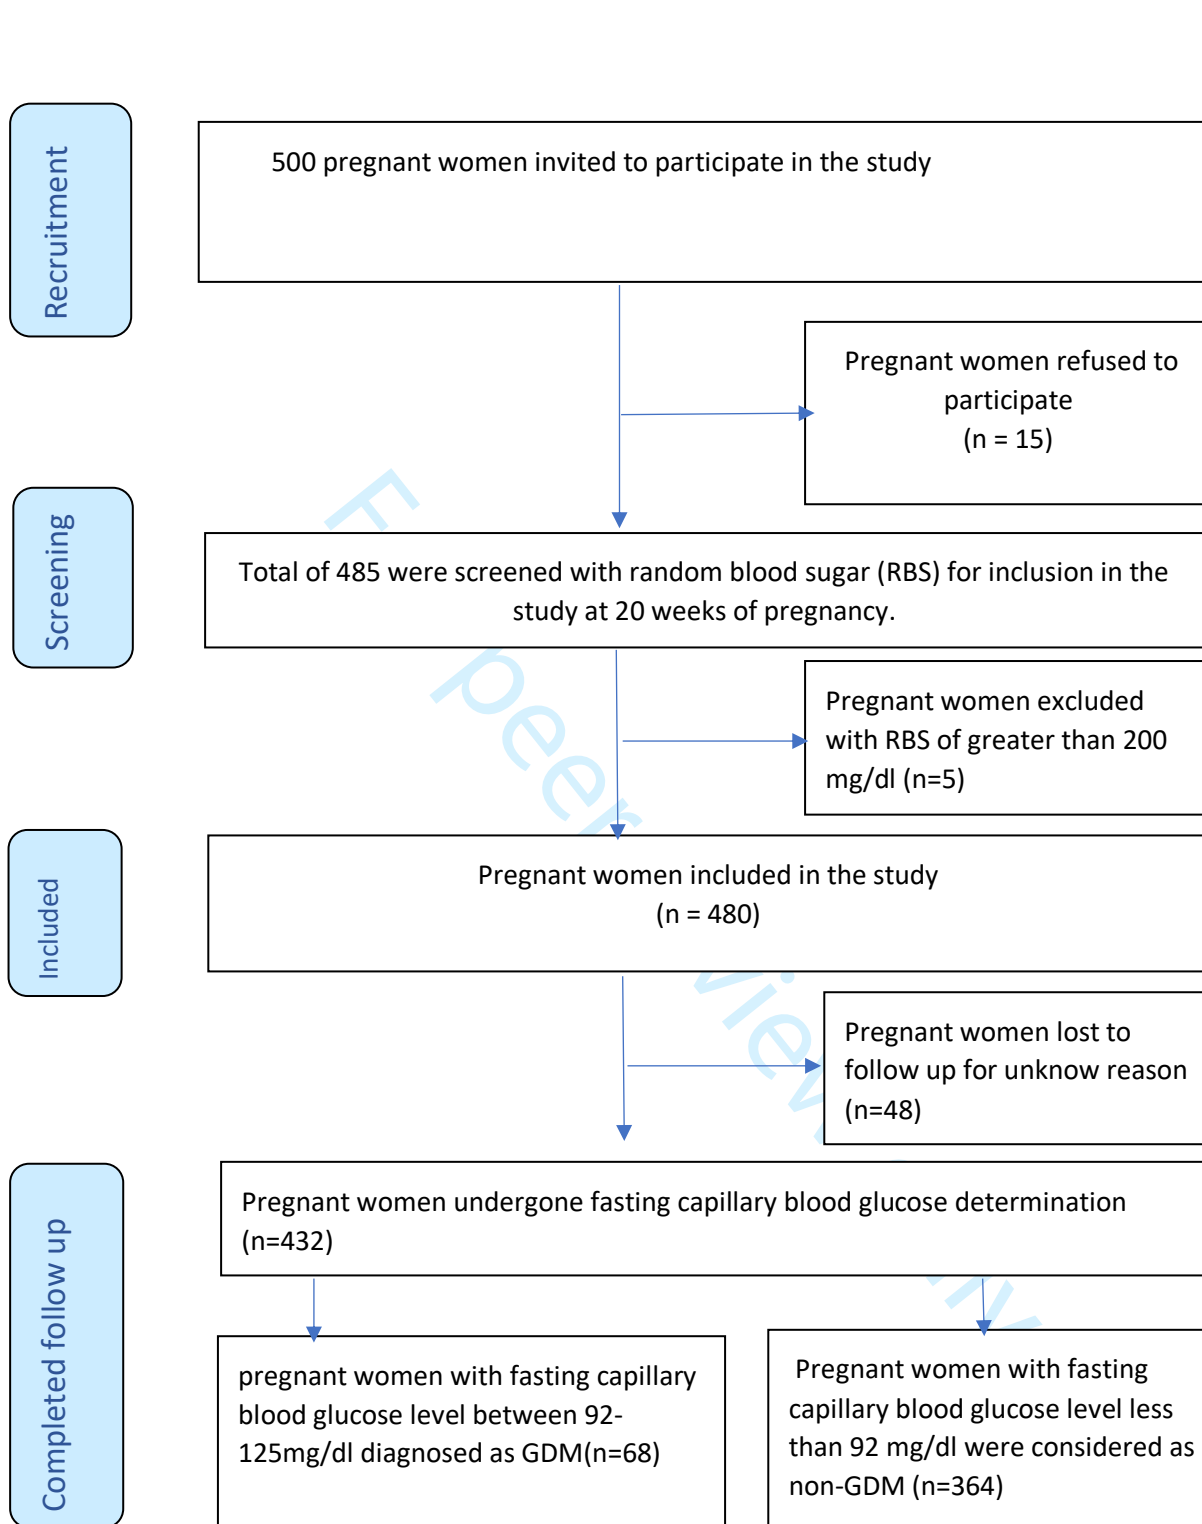

**STROBE 2007 (v4) Statement—Checklist of items that should be included in reports of *cohort studies***

| Section/Topic                | Item # | Recommendation                                                                                                                                                                       | Reported on page # |
|------------------------------|--------|--------------------------------------------------------------------------------------------------------------------------------------------------------------------------------------|--------------------|
| <b>Title and abstract</b>    | 1      | (a) Indicate the study's design with a commonly used term in the title or the abstract                                                                                               | 1                  |
|                              |        | (b) Provide in the abstract an informative and balanced summary of what was done and what was found                                                                                  | 2                  |
| <b>Introduction</b>          |        |                                                                                                                                                                                      |                    |
| Background/rationale         | 2      | Explain the scientific background and rationale for the investigation being reported                                                                                                 | 3/4                |
| Objectives                   | 3      | State specific objectives, including any prespecified hypotheses                                                                                                                     | 4                  |
| <b>Methods</b>               |        |                                                                                                                                                                                      |                    |
| Study design                 | 4      | Present key elements of study design early in the paper                                                                                                                              | 4                  |
| Setting                      | 5      | Describe the setting, locations, and relevant dates, including periods of recruitment, exposure, follow-up, and data collection                                                      | 4                  |
| Participants                 | 6      | (a) Give the eligibility criteria, and the sources and methods of selection of participants. Describe methods of follow-up                                                           | 4                  |
|                              |        | (b) For matched studies, give matching criteria and number of exposed and unexposed                                                                                                  | 4/5                |
| Variables                    | 7      | Clearly define all outcomes, exposures, predictors, potential confounders, and effect modifiers. Give diagnostic criteria, if applicable                                             | 5                  |
| Data sources/<br>measurement | 8*     | For each variable of interest, give sources of data and details of methods of assessment (measurement). Describe comparability of assessment methods if there is more than one group | 5                  |
| Bias                         | 9      | Describe any efforts to address potential sources of bias                                                                                                                            | 5                  |
| Study size                   | 10     | Explain how the study size was arrived at                                                                                                                                            | 5                  |
| Quantitative variables       | 11     | Explain how quantitative variables were handled in the analyses. If applicable, describe which groupings were chosen and why                                                         | 6                  |
| Statistical methods          | 12     | (a) Describe all statistical methods, including those used to control for confounding                                                                                                | 6                  |
|                              |        | (b) Describe any methods used to examine subgroups and interactions                                                                                                                  | 6                  |
|                              |        | (c) Explain how missing data were addressed                                                                                                                                          | 6                  |
|                              |        | (d) If applicable, explain how loss to follow-up was addressed                                                                                                                       | NA                 |
|                              |        | (e) Describe any sensitivity analyses                                                                                                                                                | NA                 |
| <b>Results</b>               |        |                                                                                                                                                                                      |                    |

|                          |     |                                                                                                                                                                                                              |          |
|--------------------------|-----|--------------------------------------------------------------------------------------------------------------------------------------------------------------------------------------------------------------|----------|
| Participants             | 13* | (a) Report numbers of individuals at each stage of study—eg numbers potentially eligible, examined for eligibility, confirmed eligible, included in the study, completing follow-up, and analysed            | 6        |
|                          |     | (b) Give reasons for non-participation at each stage                                                                                                                                                         | 6        |
|                          |     | (c) Consider use of a flow diagram                                                                                                                                                                           | figure 1 |
| Descriptive data         | 14* | (a) Give characteristics of study participants (eg demographic, clinical, social) and information on exposures and potential confounders                                                                     | 8        |
|                          |     | (b) Indicate number of participants with missing data for each variable of interest                                                                                                                          | 8        |
|                          |     | (c) Summarise follow-up time (eg, average and total amount)                                                                                                                                                  | 10       |
| Outcome data             | 15* | Report numbers of outcome events or summary measures over time                                                                                                                                               | 10       |
| Main results             | 16  | (a) Give unadjusted estimates and, if applicable, confounder-adjusted estimates and their precision (eg, 95% confidence interval). Make clear which confounders were adjusted for and why they were included | 10       |
|                          |     | (b) Report category boundaries when continuous variables were categorized                                                                                                                                    | NA       |
|                          |     | (c) If relevant, consider translating estimates of relative risk into absolute risk for a meaningful time period                                                                                             | 10       |
| Other analyses           | 17  | Report other analyses done—eg analyses of subgroups and interactions, and sensitivity analyses                                                                                                               | NA       |
| <b>Discussion</b>        |     |                                                                                                                                                                                                              |          |
| Key results              | 18  | Summarise key results with reference to study objectives                                                                                                                                                     | 12       |
| <b>Limitations</b>       |     |                                                                                                                                                                                                              |          |
| Interpretation           | 20  | Give a cautious overall interpretation of results considering objectives, limitations, multiplicity of analyses, results from similar studies, and other relevant evidence                                   | 13       |
| Generalisability         | 21  | Discuss the generalisability (external validity) of the study results                                                                                                                                        | 13       |
| <b>Other information</b> |     |                                                                                                                                                                                                              |          |
| Funding                  | 22  | Give the source of funding and the role of the funders for the present study and, if applicable, for the original study on which the present article is based                                                | 14       |

\*Give information separately for cases and controls in case-control studies and, if applicable, for exposed and unexposed groups in cohort and cross-sectional studies.

**Note:** An Explanation and Elaboration article discusses each checklist item and gives methodological background and published examples of transparent reporting. The STROBE checklist is best used in conjunction with this article (freely available on the Web sites of PLoS Medicine at <http://www.plosmedicine.org/>, Annals of Internal Medicine at <http://www.annals.org/>, and Epidemiology at <http://www.epidem.com/>). Information on the STROBE Initiative is available at [www.strobe-statement.org](http://www.strobe-statement.org).

# BMJ Open

## Incidence and risk factors of gestational diabetes mellitus in Goba town, Southeast Ethiopia: a prospective cohort study

|                                 |                                                                                                                                                                                                                                                                                                                                                                                                                                                                                                                                                                                                                                                                                                                                                                                                                                                                                                                                                                                                                                                                                                                                                                                             |
|---------------------------------|---------------------------------------------------------------------------------------------------------------------------------------------------------------------------------------------------------------------------------------------------------------------------------------------------------------------------------------------------------------------------------------------------------------------------------------------------------------------------------------------------------------------------------------------------------------------------------------------------------------------------------------------------------------------------------------------------------------------------------------------------------------------------------------------------------------------------------------------------------------------------------------------------------------------------------------------------------------------------------------------------------------------------------------------------------------------------------------------------------------------------------------------------------------------------------------------|
| Journal:                        | <i>BMJ Open</i>                                                                                                                                                                                                                                                                                                                                                                                                                                                                                                                                                                                                                                                                                                                                                                                                                                                                                                                                                                                                                                                                                                                                                                             |
| Manuscript ID                   | bmjopen-2021-060694.R2                                                                                                                                                                                                                                                                                                                                                                                                                                                                                                                                                                                                                                                                                                                                                                                                                                                                                                                                                                                                                                                                                                                                                                      |
| Article Type:                   | Original research                                                                                                                                                                                                                                                                                                                                                                                                                                                                                                                                                                                                                                                                                                                                                                                                                                                                                                                                                                                                                                                                                                                                                                           |
| Date Submitted by the Author:   | 01-Sep-2022                                                                                                                                                                                                                                                                                                                                                                                                                                                                                                                                                                                                                                                                                                                                                                                                                                                                                                                                                                                                                                                                                                                                                                                 |
| Complete List of Authors:       | Atlaw, Daniel; Madda Walabu University, ; Sahiledengle, Biniyam; Madda Walabu University, Public Health Assefa, Tesfaye ; Madda Walabu University Negash, Wogene ; Madda Walabu University Tahir, Anwar ; Madda Walabu University Regasa, Tadele ; Madda Walabu University Tekalegn, Yohannes; Madda Walabu University, Department of Public Health Mamo, Ayele ; Madda Walabu University Enegeda , zinash; Madda Walabu University Solomon, Damtew ; Madda Walabu University Gezahegn, Habtamu ; Madda Walabu University Bekele, Kebebe; Madda Walabu University Zenbaba, Demisu; Madda Walabu University, Public Health; Madda Walabu University, Public health Desta, Fikreab; Madda Walabu University, Public health Tasew, Alealign ; Madda Walabu University Nugusu, Fikadu ; Madda Walabu University Beressa, Girma; Madda Walabu University, Public Health; Jimma University, Public Health Shiferaw, Zerihun ; Madda Walabu University Feleke, Zegeye ; Madda Walabu University Regassa, Zegeye ; Madda Walabu University, Nursing Duguma, Negesso; Madda Walabu University Chattu, Vijay Kumar; Saveetha University Saveetha Medical College and Hospital, Department of Medicine |
| <b>Primary Subject Heading</b>: | Diabetes and endocrinology                                                                                                                                                                                                                                                                                                                                                                                                                                                                                                                                                                                                                                                                                                                                                                                                                                                                                                                                                                                                                                                                                                                                                                  |
| Secondary Subject Heading:      | Epidemiology, Obstetrics and gynaecology                                                                                                                                                                                                                                                                                                                                                                                                                                                                                                                                                                                                                                                                                                                                                                                                                                                                                                                                                                                                                                                                                                                                                    |
| Keywords:                       | Diabetes in pregnancy < DIABETES & ENDOCRINOLOGY, Antenatal < GENETICS, Diabetes & endocrinology < INTERNAL MEDICINE                                                                                                                                                                                                                                                                                                                                                                                                                                                                                                                                                                                                                                                                                                                                                                                                                                                                                                                                                                                                                                                                        |
|                                 |                                                                                                                                                                                                                                                                                                                                                                                                                                                                                                                                                                                                                                                                                                                                                                                                                                                                                                                                                                                                                                                                                                                                                                                             |

1  
2  
3  
4  
5  
6  
7  
8  
9  
10  
11  
12  
13  
14  
15  
16  
17  
18  
19  
20  
21  
22  
23  
24  
25  
26  
27  
28  
29  
30  
31  
32  
33  
34  
35  
36  
37  
38  
39  
40  
41  
42  
43  
44  
45  
46  
47  
48  
49  
50  
51  
52  
53  
54  
55  
56  
57  
58  
59  
60





I, the Submitting Author has the right to grant and does grant on behalf of all authors of the Work (as defined in the below author licence), an exclusive licence and/or a non-exclusive licence for contributions from authors who are: i) UK Crown employees; ii) where BMJ has agreed a CC-BY licence shall apply, and/or iii) in accordance with the terms applicable for US Federal Government officers or employees acting as part of their official duties; on a worldwide, perpetual, irrevocable, royalty-free basis to BMJ Publishing Group Ltd ("BMJ") its licensees and where the relevant Journal is co-owned by BMJ to the co-owners of the Journal, to publish the Work in this journal and any other BMJ products and to exploit all rights, as set out in our [licence](#).

The Submitting Author accepts and understands that any supply made under these terms is made by BMJ to the Submitting Author unless you are acting as an employee on behalf of your employer or a postgraduate student of an affiliated institution which is paying any applicable article publishing charge ("APC") for Open Access articles. Where the Submitting Author wishes to make the Work available on an Open Access basis (and intends to pay the relevant APC), the terms of reuse of such Open Access shall be governed by a Creative Commons licence – details of these licences and which [Creative Commons](#) licence will apply to this Work are set out in our licence referred to above.

Other than as permitted in any relevant BMJ Author's Self Archiving Policies, I confirm this Work has not been accepted for publication elsewhere, is not being considered for publication elsewhere and does not duplicate material already published. I confirm all authors consent to publication of this Work and authorise the granting of this licence.

# Incidence and risk factors of gestational diabetes mellitus in Goba town, Southeast Ethiopia: a prospective cohort study

Daniel Atlaw<sup>1</sup>, Biniyam Sahiledengle<sup>2</sup>, Tesfaye Assefa<sup>3</sup>, Wogene Negash<sup>3</sup>, Anwar Tahir<sup>3</sup>, Tadele Regasa<sup>1</sup>, Yohannes Tekalegn<sup>2</sup>, Ayele Mamo<sup>4</sup>, Zinash Teferu<sup>2</sup>, Damtew Solomon<sup>1</sup>, Habtamu Gezahegn<sup>1</sup>, Kebebe Bekele<sup>5</sup>, Demisu Zenbaba<sup>2</sup>, Alelign Tasew<sup>2</sup>, Fikreab Desta<sup>2</sup>, Fikadu Nugusu<sup>2</sup>, Girma Beressa<sup>2</sup>, Zerihun Shiferaw<sup>1</sup>, Zegeye Feleke<sup>3</sup>, Zegeye Regassa<sup>3</sup>, Negesso Duguma<sup>6</sup>, Vijay Kumar Chattu<sup>7,8</sup>

1. Biomedical Department, Madda Walabu University, Goba Referral Hospital, Bale Goba, Ethiopia
2. Public Health Department, Madda Walabu University, Goba Referral Hospital, Bale Goba, Ethiopia
3. Nursing Department, Madda Walabu University, Goba Referral Hospital, Bale Goba, Ethiopia
4. Pharmacy Department, Madda Walabu University, Goba Referral Hospital, Bale Goba, Ethiopia
5. Surgery Department, Madda Walabu University, Goba Referral Hospital, Bale Goba, Ethiopia
6. Department of laboratory, Madda Walabu University, Goba Referral Hospital, Bale Goba, Ethiopia
7. Center for Transdisciplinary Research, Saveetha Medical College and Hospitals, SIMATS, Saveetha University, Chennai 600077, India
8. Department of Community Medicine, Faculty of Medicine, Datta Meghe Institute of Medical Sciences, Wardha 442107, India

Correspondence to:

Daniel Atlaw

[danielatmwu@gmail.com](mailto:danielatmwu@gmail.com)

## Abstract

**Objective:** Gestational diabetes mellitus (GDM) is becoming a public health concern in low- and middle-income countries (LMICs), and is known to cause severe morbidity for mothers and newborns. However, evidence reported for the incidence and predictors of GDM scant in Ethiopia. We aimed to assess the incidence of, and risk factors for, gestational diabetes mellitus in Goba town, Southeast Ethiopia.

**Design:** Prospective cohort study.

**Setting:** Goba town, Southeast Ethiopia.

**Participants:** Four hundred eighty pregnant women on antenatal care (ANC) follow-up from 30<sup>th</sup> April to 30<sup>th</sup> September 2021.

**Primary and secondary outcome:** Incidence and risk factors of gestational diabetes mellitus using fasting capillary blood glucose. Log-binomial model was used to identify the risk factors of GDM. Adjusted relative risk (aRR), along with 95% confidence intervals (CIs), were calculated to estimate the strength of associations.

**Results:** The cumulative incidence of GDM in this study was 15.7% [95% CI: (12.3 to 19.2)]. Being unemployed [aRR = 2.73, 95% CI 1.36 to 5.47], having a family history of diabetes mellitus [3.01; 2.09 to 4.35], low physical activity [2.43, 1.11 to 5.32], inadequate dietary diversity [1.48, 1.29 to 1.92], anemia [2.51, 1.32 to 3.54] and antenatal depression [4.95, 3.35 to 7.31] were significantly associated with GDM.

**Conclusion:** The cumulative incidence of GDM was relatively high among the study participants. Having antenatal depression symptoms, low physical activity, inadequate dietary diversity, being unemployed, anemia, and a family history of DM were significant risk factors for GDM.

**Keywords:** Gestational diabetes mellitus, pregnant women, risk factors, incidence, Ethiopia

### Strength and limitations of this study

- The prospective design is a strength of the study.
- Fasting capillary blood glucose was used to diagnose GDM, which is less sensitive than venous blood glucose.



- The oral glucose tolerance test was not used due to resource limitations.
- Pre-pregnancy anthropometric measurements and BMI were not determined among pregnant women, which might be part of the predictor variables.

## Introduction

Gestational diabetes mellitus (GDM) is a glucose intolerance detected during pregnancy for the first time (1). It is becoming a public health concern in low and middle-income countries (LMICs), and known to cause severe morbidity for mothers and newborns (2,3). Pregnancy itself induces changes in maternal glucose metabolism and insulin sensitivity, thereby increasing the demand for insulin production (4). The common period for the diagnosis of GDM is between 24 to 28 weeks of gestation (5). However, hyperglycemia during early pregnancy was identified as a risk factor for developing GDM (6). Therefore, determining blood glucose levels as early as possible is important to decrease adverse pregnancy outcomes (7,8).

Diabetes mellitus (DM) and other non-communicable diseases are becoming more prevalent in developing countries, including Ethiopia (9). Globally, diabetes prevalence is increasing rapidly, estimated 381 million in 2013 to 422 million living with DM in 2015. According to the international diabetes federation (IDF), by 2035, the global burden of DM is projected to reach 592 million, or one in ten will have DM (10). The International Diabetes Federation (IDF) estimates that 16.2% of live births to women had some form of hyperglycemia in pregnancy (11). In sub-Saharan Africa (SSA), the burden of GDM was found to be 14.28% (12). In Ethiopia, women are at greater risk of GDM despite having a lower mean body mass index (BMI) (13). In a study conducted in Gondar town, the cumulative incidence was 12.8% (14). Other studies conducted in Wolita and Hadiya zones, the southern part of Ethiopia, reported the cumulative incidence of GDM to be 4.2% (15) and 26.2% (16), respectively.

Gestational diabetes mellitus is associated with a greater risk of neonatal macrosomia (17,18), shoulder dystocia, neonatal trauma, respiratory distress, and increased admission to neonatal intensive care units (19). Women with hyperglycemia detected during early pregnancy are at greater risk of adverse pregnancy outcomes (6), with an incidence of 30.3% (20). These include high blood pressure and birth difficulties, with the baby more prone to fractures and nerve damage (11). Gestational diabetes mellitus also results in permanent type 2 diabetes mellitus (T2DM) in women, with an incidence ranging from 2.6% to 70% (21,22).

1  
2  
3 A higher prevalence of GDM was observed in mothers with a family history of T2DM  
4 (18,23,24). Further, a study on Russian women also identified that a genetic variant in MTNR1B  
5 is associated with an increased risk of GDM (25). Previous stillbirth, high mid-upper arm  
6 circumference (MUAC), anemia (26,27), advanced maternal age (28), low physical activity, and  
7 a sedentary lifestyle have also been shown to increase the risk of GDM (24,29). A higher BMI,  
8 abdominal circumference, and fasting glycemia in the first trimester of pregnancy revealed a 13-  
9 fold increased risk of GDM(30). The proportion of gestational diabetes mellitus increases with  
10 the number of pregnancies (31).

11  
12 In most cases, adverse pregnancy outcomes among women with GDM are preventable by  
13 optimizing glycemic control. Early screening and treatment of mothers with GDM can minimize  
14 the complications for both mothers and their babies (19). Once diagnosed with GDM, a woman  
15 has a substantial chance of developing T2DM following delivery, with some studies reporting a  
16 5-year cumulative incidence rate of over 50% (32).

17  
18 Despite all the above facts, there are only a few studies on the incidence and associated factors of  
19 GDM in SSA (33), including in Ethiopia, particularly in the study setting. Therefore, we aimed  
20 to assess the incidence and risk factors of gestational diabetes mellitus in Goba town, Southeast  
21 Ethiopia.

## 22 23 24 25 26 27 28 29 30 31 32 33 34 35 **Methods**

### 36 37 **Study design and setting**

38 A facility-based prospective follow-up study was conducted among pregnant women in health  
39 centers of Goba town from April 30<sup>th</sup> to September 30<sup>th</sup>, 2021. The pregnant women were  
40 followed from 20 weeks of gestation to 32 weeks. Goba is one of the administrative towns in the  
41 Bale zone, located 445km from Addis Ababa city. According to the 2019 fiscal year, the total  
42 population of Goba town was 51,562, and the estimated number of pregnant women was 1789  
43 (34). The town has two health centers and one referral hospital. The health centers in Goba town  
44 serve more than three-fourths of pregnant women for antenatal care (ANC) follow-up.

### 45 46 47 48 49 50 51 **Source population**

52 All pregnant women who started ANC were followed-up at Harawa Sinja and Oda Baha Health  
53 Center, Goba town, southeast Ethiopia.

### **Study population**

Pregnant women with a gestational age of 20 weeks receiving ANC at Harawa Sinja and Oda Baha Health Center, Goba town, Southeast Ethiopia.

### **Inclusion criteria**

Pregnant women who are in their 20 weeks of gestation, singleton pregnancy, permanent residents of the study area, and without any known pre-existing or overt diabetes mellitus (DM).

### **Exclusion criteria**

Pregnant women who took medications that could affect glucose metabolisms, such as steroids, beta-adrenergic agonists, and antipsychotic medications, and who have an acute febrile illness were excluded.

### **Sample size determination and sampling techniques**

The sample size was determined using the following parameters: 95% confidence interval, 5% margin error, 80% power, and the prevalence of GDM from a previous study conducted in the Hadiya zone (26%) (16). For incidence rate, based on the single population formula, the sample size was determined to be 295. For risk factors (stillbirth (14), abortion (15), and family history of DM (27)) of GDM, the double population formula using EPI-info version 7 software was used to determine sample size and considering 15% loss to follow-up, 480 samples were included in this study (Table 1). After the sample size was computed for both objectives, the largest sample size was taken.

All pregnant women with a gestational age of 20 weeks were included in this study until the required sample size has reached.

**Table 1: Sample size calculation for risk factors of GDM in Goba town, Southeast Ethiopia, 2021**

| Exposure variables          | Proportion in non-exposed | proportion in the exposed | Power of the study | Crude odds ratio | Sample size | Total sample size after considering 15% loss to follow up |
|-----------------------------|---------------------------|---------------------------|--------------------|------------------|-------------|-----------------------------------------------------------|
| History of stillbirth (14)  | 5.17%                     | 14%                       | 80                 | 2.97             | 417         | 480                                                       |
| History of abortion (15)    | 16.3%                     | 45.5%                     | 80                 | 4.2              | 101         | 116                                                       |
| previous history of GDM(27) | 1.8%                      | 12%                       | 80                 | 7.4              | 236         | 271                                                       |

All pregnant women on ANC follow-up at two health centers in Goba town who fulfilled our inclusion criteria were included in the study.

### Variables of the study

#### Dependent variable

**Gestational diabetes mellitus:-** Defined as Fasting capillary blood glucose between 92 to 125 mg/dl(1).

#### Exposure variables

Sociodemographic variables such as pregnant women's age, occupation, religion, ethnicity, and educational status; behavioral variables (caffeine, alcohol, dietary diversity, and smoking); reproductive related factors; a previous medical history of (GDM, pregnancy-induced

1  
2  
3 hypertension, stillbirth, intrauterine fetal death, and spontaneous abortion); health-related  
4 (chronic disease); and family history of T2DM and GDM were considered in this study.  
5  
6

### 7 **Data collection procedures**

8  
9 An interviewer-administered, structured questionnaire was prepared in English and translated  
10 into the local language ‘Amharic and Afan Oromo.’ The questionnaire was back-translated into  
11 English to assure consistency. The questionnaire was checked by language experts (MA holders  
12 in language). Midwifery with a Bachelor of Science degree was involved in the data collection  
13 activity. Three days of training were provided to data collectors to familiarize them with the  
14 study objectives, data collection methods, ethical issues, and the questionnaire.  
15  
16  
17  
18

19  
20 Both primary and secondary data (chart review) were collected. The baseline maternal and socio-  
21 demographic characteristics, behavioral, dietary diversity, and antenatal depression status were  
22 collected using face-to-face interviews. Dietary diversity was assessed using a 24-hour food  
23 recall method by the Food and Nutrition Technical Assistance (FANTA) 2016 version of the  
24 woman’s minimum dietary diversity measurement tool. The four or less minimum dietary  
25 diversity score (MDDS) was categorized as inadequate dietary diversity (35).  
26  
27  
28  
29

30  
31 The Edinburgh Postnatal Depression Scale (EPDS) screening tool was utilized to assess antenatal  
32 depression in the past week (36). The short form of the International Physical Activity  
33 Questionnaire (IPAQ) was employed to assess the physical activities of the last seven days.  
34 Then, using metabolic equivalents (MET-minutes per week) of the IPAQ scoring protocol,  
35 pregnant women were categorized into high, moderate, and low levels of physical activity (37).  
36  
37  
38  
39

40 Fasting capillary blood glucose was performed for all pregnant women by capillary blood  
41 glucose, using a standard plasma-calibrated glucometer (Hemo Cue Glucose B-201+ (Sweden)).  
42 Even though the sensitivity of capillary blood glucose is lower than venous blood glucose, the  
43 international consensus is that it is acceptable in resource-poor settings for GDM diagnosis (5).  
44 Initially, a capillary blood glucose test (random blood glucose) was performed for all pregnant  
45 women at 20 weeks of gestation to rule out the presence of pre-existing or overt DM. Then  
46 screening for GDM using fasting capillary blood glucose was performed at 24 to 28 weeks of  
47 gestational age (Figure 1). A similar measurement was repeated at 32 weeks of gestation to  
48 identify the late occurrence of GDM. Participants diagnosed with GDM were referred  
49 immediately (linked) to health care providers who are experts in managing GDM. Follow-ups  
50  
51  
52  
53  
54  
55  
56  
57

1  
2  
3 were assured through the public health facilities in close collaboration with experts and data  
4 collectors.  
5

### 6 7 **Outcome ascertainment** 8

9  
10 In this study, initially, pregnant women were invited to participate. Then screened for pre-  
11 existing DM using random capillary blood glucose. Pregnant women identified to have random  
12 capillary blood glucose greater than 200mg/dl were excluded from the study. Finally, the  
13 included pregnant women underwent fasting capillary blood glucose measurement. Pregnant  
14 women with fasting capillary blood glucose between 92 to 125mg/dl were diagnosed as GDM,  
15 and pregnant women with fasting capillary blood glucose levels less than 92 mg/dl were declared  
16 non-GDM.  
17  
18  
19  
20  
21

### 22 **Data quality control** 23

24 The data quality was assured by applying a properly designed and pre-tested questionnaire. The  
25 tool was pre-tested on five percent of the sample size at the Baha Biftu health center one week  
26 before the actual data collection to establish its ability to elicit relevant information. In addition,  
27 the researchers ensured proper categorization and coding of the questions. The investigators and  
28 a supervisor conducted regular supervision and follow-up. In addition, a regular check-up for  
29 completeness and consistency of the data was undertaken daily. Incomplete questionnaires were  
30 completed during the second appointment. The manufacturer's instructions and standard  
31 operating procedures were strictly followed for all blood glucose measurements.  
32  
33  
34  
35  
36  
37

### 38 **Data processing and analysis** 39

40 The questionnaires were coded manually. The data were entered into Epi-data version 3.1 and  
41 then exported from Epi-data to Stata 14 for analysis. Data were checked for missing values.  
42 Descriptive statistics were presented using frequencies, percentages, mean and standard  
43 deviations to describe study subjects. Multicollinearity was checked by looking at values of  
44 variance inflation factors ( $VIF < 7$ ). Bivariate log-binomial regression analysis was employed to  
45 examine the relationship between the outcome and independent variables. All the variables with  
46  $p \leq 0.2$  in the bivariate log-binomial regression analyses were entered into a multivariable log-  
47 binomial regression model. This step helps to identify important associated factors for the  
48 dependent variables after controlling possible confounding factors. The crude and adjusted  
49 relative risk was used to estimate the strength of the association between predictors and outcome  
50  
51  
52  
53  
54  
55  
56  
57

1  
2  
3 variables. Variables with a p-value < 0.05 were considered statistically significant with the  
4  
5 outcome variable.

### 6 7 **Patient and public involvement**

8  
9 Patients and the public were not involved in the planning, designing, and interpreting the  
10  
11 analysed data.

### 12 13 14 **Ethical considerations**

15  
16  
17 The research protocol was approved by the Ethical Review Committee of Madda Walabu  
18  
19 University (Reference no: RDD/0097/13). All methods were conducted following the relevant  
20  
21 tenets of the Helsinki Declaration. An official letter was obtained from the Goba town health  
22  
23 office. Then, the letters were given to the Harawa Sinja Health Center, and the Oda Baha Health  
24  
25 Center heads. Finally, written consent was obtained from each study participant after explaining  
26  
27 the study's risks and benefits. The privacy of the respondents was secured throughout the data  
28  
29 collection process, and anonymity and confidentiality of the data were maintained.

## 30 31 **Results**

### 32 **Sociodemographic and economic characteristics of pregnant women**

33  
34 In this study, 500 pregnant women were invited to participate. Of the invited, 485 agreed to  
35  
36 participate and were screened for pre-existing DM using random capillary blood glucose. Five  
37  
38 pregnant women were identified to have random capillary blood glucose greater than 200mg/dl,  
39  
40 therefore excluded from the study. Of the remaining 480 pregnant women, 48 were lost from  
41  
42 follow-up. The remaining 432 pregnant women were undergone fasting capillary blood glucose  
43  
44 measurements. Sixty-eight pregnant women were identified to have fasting capillary blood  
45  
46 glucose levels between 92-125mg/dl, while 364 pregnant women had capillary blood glucose  
47  
48 levels less than 92mg/dl (figure 1).

49  
50 The study included a total of 432 pregnant women, making the response rate 90%. The mean age  
51  
52 of the pregnant women was 26.58 (SD ± 5.88) years. Most of the participants (97.8%) were  
53  
54 married, (88.9%) were from the Oromo ethnic group, and nearly half (47.5%) were Muslim by  
55  
56 religion. One hundred thirty-seven (31.7%) women had attended secondary school education,  
57  
58 while about 80.5% of pregnant women were unemployed (Table 2).



**Table 2: Socio-demographic and economic characteristics of pregnant women attending ANC follow-up at health centers of Goba town, Southeast Ethiopia, April to September 2021 (n = 432)**

| Variables           |                     | Non-GDM n (%) | GDM n(%)  | p-value |
|---------------------|---------------------|---------------|-----------|---------|
| Age in years        | < 25                | 159 (43.7)    | 23 (33.8) | 0.027   |
|                     | 25-29               | 120 (33.0)    | 21(30.9)  |         |
|                     | 30-34               | 52 (14.3)     | 13 (19.1) |         |
|                     | >34                 | 33 (9.1)      | 11(16.2)  |         |
| Religion            | Orthodox            | 157 (43.1)    | 28 (41.1) | 0.733   |
|                     | Muslim              | 173 (47.5)    | 32 (47.1) |         |
|                     | Protestant          | 34 (9.3)      | 8 (11.8)  |         |
| Ethnicity           | Oromo               | 293 (80.5)    | 55 (80.9) | 0.990   |
|                     | Amhara              | 61 (16.8)     | 11(16.2)  |         |
|                     | Others              | 10 (2.7)      | 2(2.9)    |         |
| Educational status  | No formal education | 53 (14.6)     | 11(16.3)  | 0.538   |
|                     | Primary school      | 117 (32.1)    | 19 (27.9) |         |
|                     | Secondary school    | 118 (32.4)    | 19 (27.9) |         |
|                     | Collage and above   | 76 (20.9)     | 19 (27.9) |         |
| Occupational status | Employed            | 60 (16.5)     | 24 (35.3) | 0.017   |
|                     | Non employed        | 304 (83.5)    | 44 (64.7) |         |

\*Others (Gurage, Wolita)

### Clinical characteristics of study participants

The mean systolic blood pressure was 105.9 (SD  $\pm$  10.2) mmHg, and diastolic blood pressure was 66.4 (SD  $\pm$  7.6) mmHg. The pregnant women's mean hemoglobin and random blood glucose levels were 11.9 (SD  $\pm$  1.1) and 108 (SD  $\pm$  16.7), respectively. Nearly one-third (33.8%) of the women were primigravida, around twenty-seven (6.3%) had a family history of DM, and fifty (11.6%) pregnant women were identified to have anemia. The previous history of abortion and stillbirth were reported among 3 and 3.8% of pregnant women, respectively (Table 3).

**Table 3: Obstetric history of study participant attending ANC follow-up at health centers of Goba town, southeast Ethiopia, April to September 2021 (n = 432)**

| Variables                                        |                | Non-GDM (n=364) | GDM (n=68) | p-value |
|--------------------------------------------------|----------------|-----------------|------------|---------|
| Gravidity                                        | One            | 143 (39.3)      | 23 (33.9)  | 0.515   |
|                                                  | Two            | 99 (27.2)       | 22 (32.4)  |         |
|                                                  | Three          | 68 (18.6)       | 11(16.2)   |         |
|                                                  | Four and above | 54 (14.3)       | 12(17.6)   |         |
| History of abortion/<br>Intrauterine fetal death | Yes            | 5 (2.3)         | 3 (6.7)    | 0.115   |
|                                                  | No             | 216 (97.7)      | 42 (93.3)  |         |



|                                                                                   |           |            |           |       |
|-----------------------------------------------------------------------------------|-----------|------------|-----------|-------|
| History of stillbirth                                                             | Yes       | 8 (3.6)    | 2 (4.4)   | 0.791 |
|                                                                                   | No        | 213 (96.4) | 43 (95.6) |       |
| History of confirmed pregnancy-induced hypertension (PIH) in a previous pregnancy | Yes       | 12 (5.4)   | 2 (4.4)   | 0.787 |
|                                                                                   | No        | 209 (94.6) | 43 (95.6) |       |
| History of confirmed GDM in a previous pregnancy                                  | Yes       | 2 (0.9)    | 1 (2.2)   | 0.446 |
|                                                                                   | No        | 119 (91.1) | 44 (97.8) |       |
| Family history of diabetes                                                        | Yes       | 17 (4.7)   | 10 (14.7) | 0.002 |
|                                                                                   | No        | 347 (95.3) | 58 (85.3) |       |
| Hemoglobin status                                                                 | < 11mg/dl | 35 (9.6)   | 15 (22.1) | 0.003 |
|                                                                                   | ≥11mg/dl  | 329 (90.4) | 53 (77.9) |       |

A slightly higher proportion of diabetes family history was revealed among women with GDM than non-GDM (14.7% vs. 4.7%). When pregnant women were compared in terms of anemia status, those with GDM had a higher proportion than non-GDM (22.1% vs. 9.6%) (Table 3).

### Behavioral and lifestyle characteristics of pregnant mothers

Out of total participants, alcohol and coffee intake during pregnancy was reported by (17.8%) and (90%), respectively. Nearly one-third of women who consumed coffee reported consuming two cups of coffee per day. Most pregnant women (45.8%) reported having low physical activity, while about one in ten pregnant women reported having probable antenatal depression symptoms. An inadequate dietary diversity score was reported in 6.3% of pregnant women participating in this study (Table 4).

**Table 4: Behavioral characteristics of study participant attending ANC follow-up at health centers of Goba town, southeast Ethiopia 2021 (n = 432)**

| Variable                                        |         | Non-GDM<br>(n = 364) | GDM<br>(n = 68) | p-value |
|-------------------------------------------------|---------|----------------------|-----------------|---------|
| History of alcohol intake during this pregnancy | Yes     | 65 (17.9)            | 12 (17.6)       | 0.967   |
|                                                 | No      | 299 (82.1)           | 56 (82.4)       |         |
| Type of alcohol                                 | Local   | 49 (75.4)            | 8 (66.7)        | 0.527   |
|                                                 | Bear    | 16 (24.6)            | 4 (33.3)        |         |
| History of coffee intake in this pregnancy      | Yes     | 326 (89.6)           | 63 (92.4)       | 0.435   |
|                                                 | No      | 38 (10.4)            | 5 (7.6)         |         |
| Number of cups of                               | One cup | 83 (25.5)            | 10 (15.9)       |         |

|                                           |                     |            |           |       |
|-------------------------------------------|---------------------|------------|-----------|-------|
| coffee per day                            | Two cups            | 110 (33.7) | 16 (25.4) | 0.002 |
|                                           | Three cups          | 79 (24.2)  | 16 (25.4) |       |
|                                           | Four and above cups | 54 (16.7)  | 21 (33.3) |       |
| Physical activity status during pregnancy | Low                 | 156 (49.7) | 42 (61.8) | 0.013 |
|                                           | Moderate            | 144 (39.6) | 20 (29.4) |       |
|                                           | High                | 64 (17.6)  | 6 (8.8)   |       |
| Antenatal depression status               | Probable depression | 24 (6.6)   | 20 (29.4) | 0.000 |
|                                           | Possible depression | 43 (11.8)  | 13 (19.1) |       |
|                                           | No depression       | 297(81.6)  | 35 (51.5) |       |
| Dietary diversity score                   | < 5 (inadequate)    | 18 (4.9)   | 9 (13.2)  | 0.010 |
|                                           | ≥ 5(adequate)       | 346 (95.1) | 59 (86.8) |       |

Low physical activity was reported to be higher among GDM than non-GDM pregnant women (61.8% vs. 49.7%). Pregnant women with GDM were shown to have a higher proportion of antenatal depression when compared with non-GDM (29.4 vs. 6.6 %). Similarly, inadequate dietary diversity was revealed to be higher among GDM when compared to non-GDM pregnant women (4.9 vs. 13.2%) (Table 4).

### Incidence of GDM

During the study period, 432 pregnant women were followed for 4781 weeks. A total of 68 pregnant women developed GDM. The mean time of diagnosis of GDM is 26.1 (95% CI 25.65 to 26.51) weeks of pregnancy. The overall incidence rate of GDM was 14.22 per 1000 weeks of follow-ups, and the cumulative incidence was 15.7% (95%: (12.3 to 19.2%)) over 5 months.

### Predictors of GDM among pregnant women.

After adjustment for maternal age, employment status, family history of diabetes, hemoglobin status, physical activity, antenatal depression, and dietary diversity. The adjusted log-binomial regression model has indicated that being unemployed [adjusted relative risk (aRR) =2.73; 95%CI:(1.36 to 5.47)], having family history of diabetes [aRR = 3.01; 95% CI: (2.09 to 4.35)], low physical activity [aRR = 2.43; 95% CI: (1.11 to 5.32)], inadequate dietary diversity [aRR = 1.48; 95% CI: (1.29 to 1.92)], anemia [aRR = 2.51; 95% CI: (1.32 to 3.54)] and antenatal depression [aRR = 4.95; 95% CI: (3.35 to 7.31)] were significantly associated with GDM (Table 5).

**Table 5: Bivariate and multivariable log-binomial regression analysis and predictors of GDM among pregnant women attending antenatal care at health centers, Goba town, southeast Ethiopia: April to September 2021 (n = 432)**

| Variables                                      |                     | Non-GDM (n=364) | GDM (n=68) | Crude relative risk (cRR) (95% CI) | adjusted relative risk (aRR) (95% CI) |
|------------------------------------------------|---------------------|-----------------|------------|------------------------------------|---------------------------------------|
| Age of women in years                          | < 25                | 159             | 23         | 1                                  | 1                                     |
|                                                | 25-29               | 120             | 21         | 1.18 (0.68 to 2.04)                | 1.36 (0.80 to 2.33)                   |
|                                                | 30-34               | 52              | 13         | 1.58 (0.85 to 2.94)                | 1.53 (0.84 to 2.77)                   |
|                                                | >34                 | 33              | 11         | 1.98 (1.04 to 3.75) <sup>+</sup>   | 1.84 (0.96 to 3.50)                   |
| Occupational status                            | Employed            | 91              | 8          | 1                                  | 1                                     |
|                                                | Non-employed        | 273             | 60         | 2.23 (1.10 to 4.5) <sup>++</sup>   | 2.73 (1.36 to 5.47) <sup>**</sup>     |
| Family history of DM                           | Yes                 | 17              | 10         | 2.59 (1.49 to 4.47) <sup>+</sup>   | 3.01(2.09 to 4.35) <sup>**</sup>      |
|                                                | No                  | 347             | 58         | 1                                  | 1                                     |
|                                                | Total               | 364             | 68         |                                    |                                       |
| hemoglobin status                              | < 11mg/dl           | 35              | 15         | 2.16 (1.32 to 3.54) <sup>+</sup>   | 2.51 (1.70 to 3.69) <sup>**</sup>     |
|                                                | ≥ 11mg/dl           | 329             | 53         | 1                                  | 1                                     |
|                                                | Total               | 364             | 68         |                                    |                                       |
| History of coffee intake in this pregnancy     | Yes                 | 326             | 63         | 1.39 (0.59 to 3.27)                |                                       |
|                                                | No                  | 38              | 5          | 1                                  |                                       |
|                                                | Total               | 364             | 68         |                                    |                                       |
| Number of cups of coffee per day               | One cup             | 83              | 10         | 1                                  |                                       |
|                                                | Two cups            | 110             | 16         | 1.18 (0.56 to 2.48)                |                                       |
|                                                | Three cups          | 79              | 16         | 1.57 (0.75 to 3.27)                |                                       |
|                                                | Four and above cups | 54              | 21         | 2.60 (1.30 to 5.19) <sup>+</sup>   |                                       |
| Physical activity status during this pregnancy | Low                 | 156             | 42         | 2.71 (1.26 to 5.82) <sup>+</sup>   | 2.43 (1.11 to 5.32)*                  |
|                                                | Moderate            | 144             | 20         | 0.57(0.35 to 0.94) <sup>+</sup>    | 1.98 (0.88 to 4.47)                   |
|                                                | High                | 64              | 6          | 1                                  | 1                                     |
| Antenatal depression status                    | Probable depression | 24              | 20         | 4.31(2.75 to 6.77) <sup>++</sup>   | 4.95 (3.35 to 7.31) <sup>**</sup>     |
|                                                | Possible depression | 43              | 13         | 2.20 (1.24 to 3.89) <sup>+</sup>   | 2.12 (1.21to 3.71) <sup>*</sup>       |
| Dietary diversity score                        | < 5                 | 18              | 9          | 1.57 (1.09 to 2.62) <sup>+</sup>   | 1.48 (1.29 to 1.92) <sup>**</sup>     |
|                                                | ≥ 5                 | 346             | 59         | 1                                  | 1                                     |

aRR: <sup>\*\*</sup>p-value < 0.001, <sup>\*</sup>p-value < 0.05. cRR: <sup>++</sup>p-value < 0.001, <sup>+</sup>p-value < 0.05.

List of variables used to adjust this model: maternal age, employment status, family history of diabetes, hemoglobin status, physical activity, antenatal depression, and dietary diversity

## Discussion

Our study aimed to assess the incidence and risk factors of gestational diabetes mellitus in Goba town, Southeast Ethiopia. In this study, the cumulative incidence of GDM among pregnant women attending ANC in health centers of Goba town was 15.7%. Our finding was almost similar to studies conducted in Gondar town, Ethiopia (12.8%) (14) and Qingdao, China (17%) (38). The current finding was higher than the study conducted in Wolita Zone, Ethiopia (4.2%) (13), and the possible reason might be due to the difference in the sample size.

Nevertheless, it was lower than a study conducted in Tanzania in which the cumulative incidence was found to be 19.5% (39). The cumulative incidence of GDM in this study was lower than the findings from a Nigerian study which was reported at 21.2% (40). Another study conducted in Hadiya Zone, Ethiopia, revealed a higher incidence than our finding (26.2%) (16). These figures show that the incidence of GDM is increasing as other chronic medical conditions, which have been increasing with lifestyle shifts such as consuming fast food and increasing sedentary lifestyles. The variation might be variation in sample size and other sociodemographic variables.

Unemployment was shown to have a significant statistical association with GDM. As revealed in this study, non-employed pregnant women had 2.73 times higher risk of developing GDM than employed pregnant women. The current finding disagreed with a study conducted in Gondar town (14). The variation might be because of the difference in sociodemographic characteristics. Further, among unemployed women, low physical activity was shown to have a difference in non-GDM and GDM pregnant women (46%vs 67%), respectively. This difference is supported by the evidence that employed adults were more likely to be physically active than non-employed (41) (42). Similarly, employed pregnant women were physically active compared with the non-employed group (43). Physical inactivity, in turn, increases the risk of developing GDM (44). In this study, pregnant women with low physical activity were 2.43 times more at risk of GDM than pregnant women with high physical activity. This finding is supported by a study conducted in Gondar town (14) and the Amhara region, Ethiopia (27). Another study from Tanzania has identified low physical activity as a risk factor for GDM (45).

The risk of developing GDM was 2.6 times higher in pregnant women with a family history of diabetes than in their counterparts. This finding is in agreement with a prospective cohort study conducted in Florida which revealed that the risk of GDM among women with a family history

1  
2  
3 of DM increased two-fold (46). Similarly, a study in Poland (Poznan city) identified family  
4 history of diabetes as an independent risk factor for GDM (47). This association could be  
5 because GDM has a genetic component that may predispose individuals to glucose intolerance  
6 during pregnancy, and T2DM shares a common genetic background with GDM (48).  
7  
8  
9

10 Anemia was also shown to have an association with the occurrence of GDM. Our finding  
11 indicated that pregnant women with anemia were 1.9 times at risk of developing GDM compared  
12 with non-anemic pregnant women. The finding is supported by a study conducted in Tanzania  
13 that revealed pregnant women with anemia were at increased risk of developing GDM (26).  
14 Although there is no evidence to suggest that managing anemia with iron supplementation  
15 increases the risk of GDM, some evidence suggests that pregnant women who get iron  
16 supplements for anemia have excess iron deposited during pregnancy and are at an increased risk  
17 of developing GDM (49). Further increased ferritin, hemoglobin, and dietary heme intake was  
18 associated with an increased risk of GDM (50).  
19  
20  
21  
22  
23  
24  
25  
26

27 The probability of developing GDM was 3.1 times in the pregnant women who reported  
28 antenatal depression symptoms than those with no depression symptoms. The present result  
29 supported a study conducted in Chicago which revealed that women with GDM were 3.79 times  
30 more likely to have a history of depression (51). Similarly, a cohort study conducted in Canada  
31 has reported a two-fold increased risk of depression among GDM women than in non-GDM  
32 (52). The possible explanation could be depression results in hypercortisolemia, increasing  
33 insulin resistance (53).  
34  
35  
36  
37  
38  
39

40 In this study, pregnant women with inadequate dietary diversity were 1.5 times more at risk of  
41 developing GDM than those with adequate dietary diversity. The finding agreed with the study  
42 conducted in Gondar town, where pregnant women with inadequate dietary diversity were at risk  
43 of developing GDM (14). This observation can be because inadequate dietary diversity will  
44 decrease the probability of getting a high-fiber diet that controls blood sugar levels (54). Further,  
45 inadequate dietary diversity decreases the chance of getting antioxidants in food consumed,  
46 which is important to prevent or delay b-cell dysfunction in diabetes by protecting against  
47 glucose toxicity (55).  
48  
49  
50  
51  
52  
53

54 Our study has identified a few limitations. Firstly, we used fasting capillary blood glucose to  
55 diagnose GDM due to a lack of resources for oral glucose tolerance tests that might affect the  
56  
57  
58  
59  
60

1  
2  
3 strength of recommendations. However, various studies have reported fasting capillary glucose  
4 as the most sensitive and specific test (56,57) and recommended to be conducted in resource-  
5 limited settings (56). Secondly, even though capillary blood glucose is recommended in  
6 resource-limited settings, it is less sensitive than venous blood glucose. Thirdly, pre-pregnancy  
7 anthropometric measurement and BMI were not determined among pregnant women, which may  
8 be part of the determinant factors.  
9  
10  
11  
12

### 13 14 **Conclusion**

15  
16 The cumulative incidence of GDM was relatively high in Goba town. Having antenatal  
17 depression symptoms, anemia, a family history of diabetes, low physical activity, inadequate  
18 dietary diversity, and being unemployed were identified as risk factors for GDM. Therefore,  
19 increasing community awareness of physical exercise, increasing recreational activities, and  
20 diversifying food intake during pregnancy are important. The study's findings would be an input  
21 for decision-makers to combat GDM in Ethiopia.  
22  
23  
24  
25  
26

### 27 **Acknowledgements**

28  
29 We would like to thank all the participants of this study and data collectors. We would also like  
30 to extend our sincere gratitude to Madda Walabu University for providing financial support.  
31  
32  
33

### 34 **Contributors**

35  
36 DA has contributed substantially to the conception and design, acquisition of data, analysis, and  
37 interpretation of data. DA has written the draft manuscript and provided final approval of the  
38 version to be published. BS, TA, WN, AT, TR, YT, AM, ZT, DS, HG, KB, DZ, AT, FD, FN,  
39 GB, ZS, ZF, ZR, and VKC have made substantial contributions to the design, acquisition of data,  
40 analysis, and interpretation of data. All revised the article critically for important intellectual  
41 content and provided final approval of the version to be published. All authors read and approved  
42 the final manuscript.  
43  
44  
45  
46  
47  
48

### 49 **Funding**

50  
51 The data collection was supported by Madda Walabu University grant number (Pr/89/699).  
52  
53

### 54 **Disclaimer**

1  
2  
3 The funders had no role in the study design, data collection, analysis, decision to publish, or  
4 preparation of the manuscript.  
5

### 6 **Competing interests**

7  
8  
9 None declared.  
10

### 11 **Patient consent for publication**

12  
13  
14 Not required.  
15

### 16 **Ethical approval**

17  
18  
19 The research protocol was approved by Ethical Review Committee, Madda Walabu University  
20 (Reference no: RDD/0097/13). All methods were conducted following the relevant tenets of the  
21 Helsinki Declaration. An official letter was obtained from the Goba town health office. Then, the  
22 letters were given to the Harawa Sinja Health Center, and the Oda Baha Health Center heads.  
23  
24 Finally, written consent was obtained from each study participant after explaining the study's  
25 risks and benefits. The privacy of the respondents was protected though out the data collection  
26 process, and anonymity and confidentiality of the data were maintained.  
27  
28  
29  
30

### 31 **Data availability statement**

32  
33  
34 The SPSS data used for this study will be available upon request from the corresponding author.  
35  
36  
37

## 38 **References**

- 39 1. WHO. Diagnostic Criteria and Classification of Hyperglycaemia First Detected in Pregnancy. 2013.
- 40 2. Domanski G, Lange AE, Ittermann T, Allenberg H, Spoo RA, Zygmunt M, et al. Evaluation of  
41 neonatal and maternal morbidity in mothers with gestational diabetes: a population-based study.  
42 BMC Pregnancy Childbirth. 2018;18(1):367.
- 43 3. Lee KW, Ching SM, Ramachandran V, Yee A, Hoo FK, Chia YC, et al. Prevalence and risk factors of  
44 gestational diabetes mellitus in Asia: A systematic review and meta-analysis. BMC Pregnancy  
45 Childbirth. 2018;18(1):1–20.
- 46 4. Macaulay S, Dunger D, Norris S. Gestational Diabetes Mellitus in Africa : A Systematic Review.  
47 PLoS One. 2014;9(6):1–11.
- 48 5. Simeoni U, Sobngwi E. The International Federation of Gynecology and Obstetrics ( F I G O )  
49 Initiative on gestational diabetes mellitus : A pragmatic guide for diagnosis , management , and  
50 care. Int J Gynecol Obstet J. 2015;3(131):173–211.  
51  
52  
53  
54  
55  
56  
57  
58  
59  
60



- 1
  - 2
  - 3
  - 4
  - 5
  - 6
  - 7
  - 8
  - 9
  - 10
  - 11
  - 12
  - 13
  - 14
  - 15
  - 16
  - 17
  - 18
  - 19
  - 20
  - 21
  - 22
  - 23
  - 24
  - 25
  - 26
  - 27
  - 28
  - 29
  - 30
  - 31
  - 32
  - 33
  - 34
  - 35
  - 36
  - 37
  - 38
  - 39
  - 40
  - 41
  - 42
  - 43
  - 44
  - 45
  - 46
  - 47
  - 48
  - 49
  - 50
  - 51
  - 52
  - 53
  - 54
  - 55
  - 56
  - 57
  - 58
  - 59
  - 60
6. Popova P, Tkachuch A, Dronova A, et al. Fasting glycemia at the first prenatal visit and pregnancy outcomes in Russian women. *Minerva Endocrinol.* 2016;41(4):477–85.
7. Popova P, Castorino K, Grineva EN, Kerr D. Gestational diabetes mellitus diagnosis and treatment goals: measurement and measures. *Minerva Endocrinol.* 2016;
8. Quaresima P, Visconti F, Chiefari E, Mirabelli M, Borelli M, Caroleo P, et al. Appropriate Timing of Gestational Diabetes Mellitus Diagnosis in Medium- and Low-Risk Women : Effectiveness of the Italian NHS Recommendations in Preventing Fetal Macrosomia. *J Diabetes Res Res.* 2020;2020.
9. Habtewold TD, Tsega WD, Wale BY. Diabetes Mellitus in Outpatients in Debre Berhan Referral Hospital , Ethiopia. *J Diabetes Res.* 2016;2016.
10. IDF Diabetes Atlas Committee. The Global Burden of diabetes. 2013.
11. International Diabetes Federation. *Idf diabetes atlas.* 2019.
12. Mucho AA, Olayemi OO, Gete YK. Prevalence and determinants of gestational diabetes mellitus in Africa based on the updated international diagnostic criteria: A systematic review and meta-analysis. *Arch Public Heal.* 2019;77(1):1–20.
13. Jaffe A, Giveon S, Rubin C, Novikov I, Ziv A, Kalter O. Gestational diabetes risk in a multi - ethnic population. *Acta Diabetol [Internet].* 2020;57(3):263–9. Available from: <https://doi.org/10.1007/s00592-019-01404-8>
14. Mucho AA, Olayemi OO, Gete YK. Prevalence of gestational diabetes mellitus and associated factors among women attending antenatal care at Gondar town public health facilities , Northwest Ethiopia. *BMC.* 2019;19(334):1–13.
15. Wolka E, Deressa W, Reja A, Woticha EW, Deressa W, Reja A. Prevalence of gestational diabetes mellitus and associated factors in Southern Ethiopia. *Asian J Med Sci.* 2018;10(1):86–91.
16. Larebo YM, Ermolo NA. Prevalence and Risk Factors of Gestational Diabetes Mellitus among Women Attending Antenatal Care in Hadiya Zone Public Hospitals, Southern Nation Nationality People Region. *Biomed Res Int.* 2021;2021:1–10.
17. Karaçam Z, Çelîk D. The prevalence and risk factors of gestational diabetes mellitus in Turkey: a systematic review and meta-analysis. *J Matern Neonatal Med.* 2021;34(8):1331–41.
18. Yaping X, Chunhong L, Huifen Z, Fengfeng H, Huibin H, Meijing Z. Risk factors associated with gestational diabetes mellitus: a retrospective case-control study. *Int J Diabetes Dev Ctries.* 2021;
19. Wakwoya EB, Amante TD, Tesema KF. Gestational Diabetes Mellitus Is a Risk for Macrosomia : Case- Control Study in Eastern Ethiopia. 2018;
20. Asmamaw A, Olayemi OO, Kebede Y. Gestational diabetes mellitus increased the risk of adverse neonatal outcomes : A prospective cohort study in Northwest Ethiopia. *Midwifery J.* 2020;87.
21. Chivese T, Norris SA, Levitt NS. Progression to type 2 diabetes mellitus and associated risk factors after hyperglycemia first detected in pregnancy: A cross-sectional study in Cape Town, South Africa. *PLoS Med.* 2019;16(9):1–18.
22. Mucho AA, Olayemi OO, Gete YK. Predictors of postpartum glucose intolerance in women with gestational diabetes mellitus : a prospective cohort study in Ethiopia based on the updated



- 1  
2  
3 diagnostic criteria. *BMJ Open*. 2020;10:1–8.  
4
- 5 23. Malhotra A, Stewart A. Gestational diabetes and the neonate: challenges and solutions. *Res*  
6 *Reports Neonatol*. 2015;31.  
7
- 8 24. Larrabure-Torrealva GT, Martinez S, Luque-Fernandez MA, Sanchez SE, Mascaro PA, Ingar H, et  
9 al. Prevalence and risk factors of gestational diabetes mellitus: Findings from a universal  
10 screening feasibility program in Lima, Peru. *BMC Pregnancy Childbirth*. 2018;18(1):1–9.  
11
- 12 25. Popova P V, Klyushina AA, Vasilyeva LB, Tkachuk AS, Vasukova EA, Anopova AD, et al. Association  
13 of Common Genetic Risk Variants With Gestational Diabetes Mellitus and Their Role in GDM  
14 Prediction. *Front Endocrinol (Lausanne)*. 2021;12(April):1–7.  
15
- 16 26. Mwanri AW, Kinabo J, Ramaiya K, Feskens EJM. Prevalence of gestational diabetes mellitus in  
17 urban and rural Tanzania. *Diabetes Res Clin Pract* [Internet]. 2013;103(1):71–8. Available from:  
18 <http://dx.doi.org/10.1016/j.diabres.2013.11.021>  
19
- 20 27. Feleke BE. Determinants of Gestational Diabetes Mellitus, a case-control study. *J Matern*  
21 *Neonatal Med*. 2017;7.  
22
- 23 28. Teh WT, Teede HJ, Paul E, Harrison CL, Wallace EM, Allan C. Risk factors for gestational diabetes  
24 mellitus: Implications for the application of screening guidelines. *Aust New Zeal J Obstet*  
25 *Gynaecol*. 2011;51(1):26–30.  
26
- 27 29. Muche AA, Olayemi OO, Gete YK. Effects of gestational diabetes mellitus on risk of adverse  
28 maternal outcomes : a prospective cohort study in Northwest Ethiopia. *BMC Pregnancy*  
29 *Childbirth*. 2020;20(73):1–13.  
30
- 31 30. Popova Vp, Grineva E, Ryazantseva E, Shelepova E. The new combination of risk factors  
32 determining a high risk of gestational diabetes mellitus. *Minerva Endocrinol*. 2015;40(4):239–47.  
33
- 34 31. Wolka E, Deressa W, Reja A. Prevalence of gestational diabetes mellitus and associated factors in  
35 Southern Ethiopia. *ASIAN J Med Sci*. 2019;10(1).  
36
- 37 32. Hunt KJ, Schuller KL. The Increasing Prevalence of Diabetes in Pregnancy. *Obs Gynecol Clin N Am*.  
38 2007;34:173–99.  
39
- 40 33. Mwanri AW, Kinabo J, Ramaiya K, Feskens EJM. Gestational diabetes mellitus in sub-Saharan  
41 Africa: Systematic review and metaregression on prevalence and risk factors. *Trop Med Int Heal*.  
42 2015;20(8):983–1002.  
43
- 44 34. Central statistical Agency. Federal Democratic Republic of Ethiopia Central Statistical Agency  
45 Population Projection of Ethiopia for All Regions At Wereda Level from 2014 – 2017. 2014.  
46
- 47 35. FANTA. Minimum Dietary Diversity for Women: A Guide for Measurement [Internet]. 2016.  
48 Available from: <http://www.fao.org/3/a-i5486e.pdf>  
49
- 50 36. Matthey S, Barnett B, White T. The Edinburgh Postnatal Depression Scale. *Br J Psychiatry*.  
51 2003;182(4):368–368.  
52
- 53 37. Edwards MK, Loprinzi PD. Affective Responses to Acute Bouts of Aerobic Exercise, Mindfulness  
54 Meditation, and Combinations of Exercise and Meditation: A Randomized Controlled  
55 Intervention. *Psychol Rep*. 2019;122(2):465–84.  
56  
57  
58  
59  
60

- 1
- 2
- 3 38. Li G, Wei T, Ni W, Zhang A, Zhang J, Xing Y, et al. Incidence and Risk Factors of Gestational
- 4 Diabetes Mellitus: A Prospective Cohort Study in Qingdao, China. *Front Endocrinol (Lausanne)*.
- 5 2020;11(September):1–9.
- 6
- 7 39. Njete HI, John B, Mlay P, Mahande MJ, Msuya SE. Prevalence, predictors and challenges of
- 8 gestational diabetes mellitus screening among pregnant women in northern Tanzania. *Trop Med*
- 9 *Int Heal*. 2018;23(2):236–42.
- 10
- 11 40. Abbey M, Kasso T. First Trimester Fasting Blood Glucose as a Screening Tool for Diabetes Mellitus
- 12 in a Teaching Hospital Setting in Nigeria. *Asian J Med Heal*. 2018;10(4):1–9.
- 13
- 14 41. Amenu K, Gelibo T, Getnet M, Taddele T, Getachew T, Defar A. Magnitude and determinants of
- 15 physical inactivity in Ethiopia : Evidence from 2015 Ethiopia National NCD Survey. *Ethiop J Heal*
- 16 *Dev*. 2017;31.
- 17
- 18 42. Mengesha MM, Roba HS, Ayele BH, Beyene AS. Level of physical activity among urban adults and
- 19 the socio-demographic correlates: A population-based cross-sectional study using the global
- 20 physical activity questionnaire. *BMC Public Health*. 2019;19(1):1–11.
- 21
- 22 43. Hailemariam TT, Gebregiorgis YS, Gebremeskel BF, Haile TG, Spitznagle TM. Physical activity and
- 23 associated factors among pregnant women in Ethiopia: Facility-based cross-sectional study. *BMC*
- 24 *Pregnancy Childbirth*. 2020;20(1):1–11.
- 25
- 26 44. Mishra S, Kishore S. Effect of physical activity during pregnancy on gestational diabetes mellitus.
- 27 *Indian J Endocrinol Metab*. 2018;22(5):661–71.
- 28
- 29 45. Mdoe MB, Kibusi SM, Munyogwa MJ, Ernest AI. Prevalence and predictors of gestational diabetes
- 30 mellitus among pregnant women attending antenatal clinic in Dodoma region, Tanzania: An
- 31 analytical cross-sectional study. *BMJ Nutr Prev Heal*. 2021;4(1):69–79.
- 32
- 33 46. Solomon G, Willett WC, Carey VJ, Rich-Edwards J, Hunter DJ, Colditz GA, et al. A prospective
- 34 study of pregravid determinants of gestational diabetes mellitus. *J Am Med Assoc*.
- 35 1997;278(13):1078–83.
- 36
- 37 47. Lewandowska M. Gestational diabetes mellitus (GDM) risk for declared family history of diabetes,
- 38 in combination with BMI categories. *Int J Environ Res Public Health*. 2021;18(13).
- 39
- 40 48. Kwak SH, Jang HC, Park KS. Finding Genetic Risk Factors of Gestational Diabetes. *Genomics*
- 41 *Inform*. 2012;10(4):239.
- 42
- 43 49. Zhang C, Rawal S. Dietary iron intake, iron status, and gestational diabetes. *Am J Clin Nutr*.
- 44 2017;106:1672S–1680S.
- 45
- 46 50. Kataria Y, Wu Y, Horskjær P de H, Mandrup-Poulsen T, Ellervik C. Iron status and gestational
- 47 diabetes—a meta-analysis. *Nutrients*. 2018;10(5):1–15.
- 48
- 49 51. Byrn M, Penckofer S. The Relationship Between Gestational Diabetes and Antenatal Depression.
- 50 *JOGNN - J Obstet Gynecol Neonatal Nurs*. 2015;44(2):246–55.
- 51
- 52 52. Pace R, Rahme E, Da Costa D, Dasgupta K. Association between gestational diabetes mellitus and
- 53 depression in parents: A retrospective cohort study. *Clin Epidemiol*. 2018;10:1827–38.
- 54
- 55 53. Weber, Schweiger, Deuschle, Heuser. Major depression and impaired glucose tolerance.
- 56 *Endocrinol Diabetes*. 2000;108(2000):187–90.
- 57
- 58
- 59
- 60

- 1  
2  
3 54. Reynolds AN, Akerman AP, Mann J. Dietary fibre and whole grains in diabetes management: Systematic review and meta-analyses. PLoS Med [Internet]. 2020;17(3):e1003053. Available from: <http://dx.doi.org/10.1371/journal.pmed.1003053>
- 7 55. Kaneto H, Kajimoto Y, Miyagawa J ichiro, Matsuoka T aki, Fujitani Y, Umayahara Y, et al. Beneficial effects of antioxidants in diabetes: Possible protection of pancreatic  $\beta$ -cells against glucose toxicity. Diabetes. 1999;48(12):2398–406.
- 11 56. Saeedi M, Hanson U, Simmons D, Fadl H. Characteristics of different risk factors and fasting plasma glucose for identifying GDM when using IADPSG criteria: A cross-sectional study. BMC Pregnancy Childbirth. 2018;18(1):1–6.
- 15 57. Reyes-Muñoz E, Sandoval-Osuna NL, Reyes-Mayoral C, Ortega-González C, Martínez-Cruz N, Ramírez-Torres MA, et al. Sensitivity of fasting glucose for gestational diabetes mellitus screening in Mexican adolescents based on International Association of Diabetes and Pregnancy Study Groups criteria: A diagnostic accuracy study based on retrospective data analysis. BMJ Open. 2018;8(4):1–7.

#### Figure title

**Figure 1: Flow diagram of outcome ascertainment for pregnant women on ANC from April 30 to September 30, 2021**

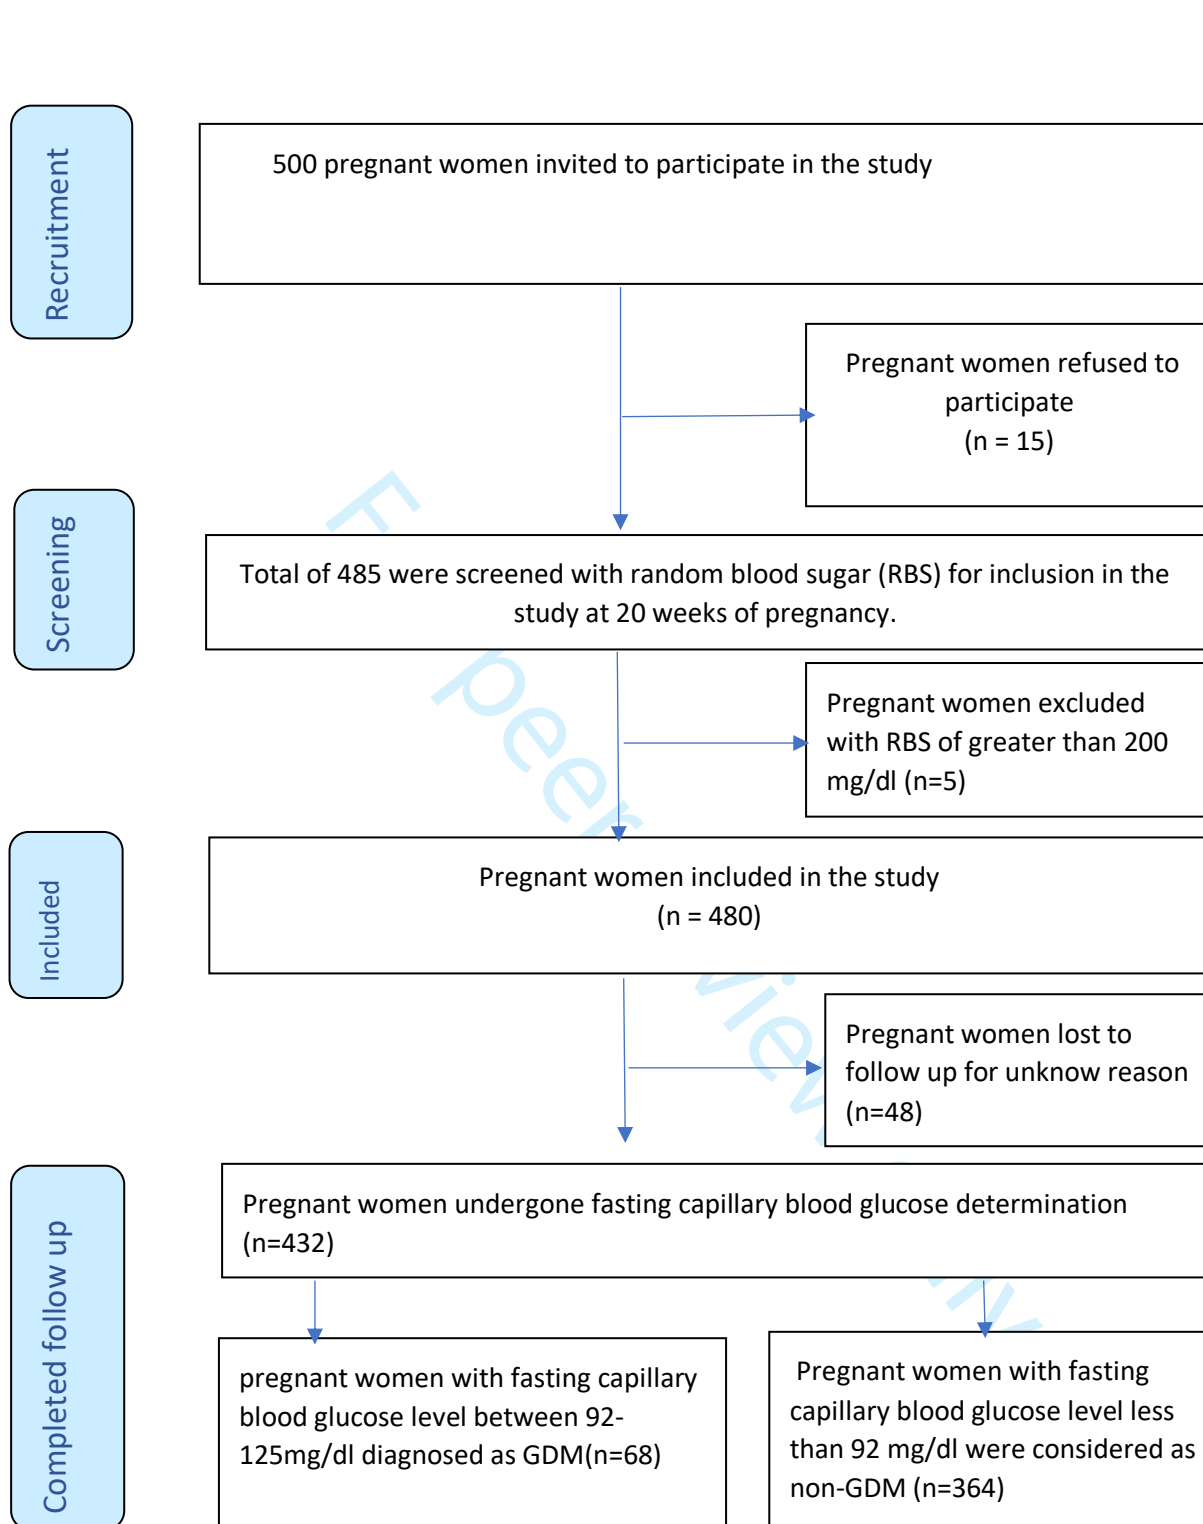

**STROBE 2007 (v4) Statement—Checklist of items that should be included in reports of cohort studies**

| Section/Topic                | Item # | Recommendation                                                                                                                                                                       | Reported on page # |
|------------------------------|--------|--------------------------------------------------------------------------------------------------------------------------------------------------------------------------------------|--------------------|
| <b>Title and abstract</b>    | 1      | (a) Indicate the study’s design with a commonly used term in the title or the abstract                                                                                               | 1                  |
|                              |        | (b) Provide in the abstract an informative and balanced summary of what was done and what was found                                                                                  | 2                  |
| <b>Introduction</b>          |        |                                                                                                                                                                                      |                    |
| Background/rationale         | 2      | Explain the scientific background and rationale for the investigation being reported                                                                                                 | 3/4                |
| Objectives                   | 3      | State specific objectives, including any prespecified hypotheses                                                                                                                     | 4                  |
| <b>Methods</b>               |        |                                                                                                                                                                                      |                    |
| Study design                 | 4      | Present key elements of study design early in the paper                                                                                                                              | 4                  |
| Setting                      | 5      | Describe the setting, locations, and relevant dates, including periods of recruitment, exposure, follow-up, and data collection                                                      | 4                  |
| Participants                 | 6      | (a) Give the eligibility criteria, and the sources and methods of selection of participants. Describe methods of follow-up                                                           | 4                  |
|                              |        | (b) For matched studies, give matching criteria and number of exposed and unexposed                                                                                                  | 4/5                |
| Variables                    | 7      | Clearly define all outcomes, exposures, predictors, potential confounders, and effect modifiers. Give diagnostic criteria, if applicable                                             | 5                  |
| Data sources/<br>measurement | 8*     | For each variable of interest, give sources of data and details of methods of assessment (measurement). Describe comparability of assessment methods if there is more than one group | 5                  |
| Bias                         | 9      | Describe any efforts to address potential sources of bias                                                                                                                            | 5                  |
| Study size                   | 10     | Explain how the study size was arrived at                                                                                                                                            | 5                  |
| Quantitative variables       | 11     | Explain how quantitative variables were handled in the analyses. If applicable, describe which groupings were chosen and why                                                         | 6                  |
| Statistical methods          | 12     | (a) Describe all statistical methods, including those used to control for confounding                                                                                                | 6                  |
|                              |        | (b) Describe any methods used to examine subgroups and interactions                                                                                                                  | 6                  |
|                              |        | (c) Explain how missing data were addressed                                                                                                                                          | 6                  |
|                              |        | (d) If applicable, explain how loss to follow-up was addressed                                                                                                                       | NA                 |
|                              |        | (e) Describe any sensitivity analyses                                                                                                                                                | NA                 |
| <b>Results</b>               |        |                                                                                                                                                                                      |                    |

|                          |     |                                                                                                                                                                                                              |          |
|--------------------------|-----|--------------------------------------------------------------------------------------------------------------------------------------------------------------------------------------------------------------|----------|
| Participants             | 13* | (a) Report numbers of individuals at each stage of study—eg numbers potentially eligible, examined for eligibility, confirmed eligible, included in the study, completing follow-up, and analysed            | 6        |
|                          |     | (b) Give reasons for non-participation at each stage                                                                                                                                                         | 6        |
|                          |     | (c) Consider use of a flow diagram                                                                                                                                                                           | figure 1 |
| Descriptive data         | 14* | (a) Give characteristics of study participants (eg demographic, clinical, social) and information on exposures and potential confounders                                                                     | 8        |
|                          |     | (b) Indicate number of participants with missing data for each variable of interest                                                                                                                          | 8        |
|                          |     | (c) Summarise follow-up time (eg, average and total amount)                                                                                                                                                  | 10       |
| Outcome data             | 15* | Report numbers of outcome events or summary measures over time                                                                                                                                               | 10       |
| Main results             | 16  | (a) Give unadjusted estimates and, if applicable, confounder-adjusted estimates and their precision (eg, 95% confidence interval). Make clear which confounders were adjusted for and why they were included | 10       |
|                          |     | (b) Report category boundaries when continuous variables were categorized                                                                                                                                    | NA       |
|                          |     | (c) If relevant, consider translating estimates of relative risk into absolute risk for a meaningful time period                                                                                             | 10       |
| Other analyses           | 17  | Report other analyses done—eg analyses of subgroups and interactions, and sensitivity analyses                                                                                                               | NA       |
| <b>Discussion</b>        |     |                                                                                                                                                                                                              |          |
| Key results              | 18  | Summarise key results with reference to study objectives                                                                                                                                                     | 12       |
| <b>Limitations</b>       |     |                                                                                                                                                                                                              |          |
| Interpretation           | 20  | Give a cautious overall interpretation of results considering objectives, limitations, multiplicity of analyses, results from similar studies, and other relevant evidence                                   | 13       |
| Generalisability         | 21  | Discuss the generalisability (external validity) of the study results                                                                                                                                        | 13       |
| <b>Other information</b> |     |                                                                                                                                                                                                              |          |
| Funding                  | 22  | Give the source of funding and the role of the funders for the present study and, if applicable, for the original study on which the present article is based                                                | 14       |

\*Give information separately for cases and controls in case-control studies and, if applicable, for exposed and unexposed groups in cohort and cross-sectional studies.

**Note:** An Explanation and Elaboration article discusses each checklist item and gives methodological background and published examples of transparent reporting. The STROBE checklist is best used in conjunction with this article (freely available on the Web sites of PLoS Medicine at <http://www.plosmedicine.org/>, Annals of Internal Medicine at <http://www.annals.org/>, and Epidemiology at <http://www.epidem.com/>). Information on the STROBE Initiative is available at [www.strobe-statement.org](http://www.strobe-statement.org).
